1 **Short title:** NAA50 acetyl transferase is required for growth

2

3

4 **The Arabidopsis N-terminal Acetyltransferase NAA50**  
5 **Regulates Plant Growth and Defense**

6

7 **Matthew Neubauer<sup>1</sup> and Roger W. Innes<sup>1</sup>**

8

9 <sup>1</sup>Department of Biology, Indiana University, Bloomington, IN 47405, U.S.A

10

11

12 **One Sentence Summary:**

13 Knockout in Arabidopsis of the broadly conserved N-terminal acetyl transferase NAA50  
14 induces ER stress, leading to severe dwarfism and induction of defense responses.

15

16 **Footnotes:**

17

18 **Author contributions:**

19 M.N. conceived and performed all experiments, analyzed all data, and wrote the manuscript.

20 R.W.I. supervised experiments, assisted with data interpretation, and edited the manuscript.

21 R.W.I. agrees to serve as the author responsible for contact and ensures communication.

22

23 **Funding information:**

24 M.N. was supported by a training grant from the National Institute of General Medical Sciences

25 (NIGMS) and a Carlos O. Miller Fellowship from the Indiana University Foundation. This work was

26 funded in part by the United States National Institute of General Medical Sciences of the National

27 Institutes of Health (Grant R01 GM063761 to R.W.I.) and by the U.S. National Science Foundation

28 (Grant IOS-1645745 to R.W.I.).

29

30 **Corresponding Author:** R. W. Innes; E-mail: [rinnes@indiana.edu](mailto:rinnes@indiana.edu); Telephone: +1.812.855.2219;

31

32

## 33 **Abstract**

34           Stress signaling in plants is carefully regulated to ensure proper development and  
35 reproductive fitness. Overactive defense signaling can result in dwarfism as well as  
36 developmental defects. In addition to requiring a significant amount of energy, plant stress  
37 responses place a burden upon the cellular machinery, which can result in the accumulation of  
38 misfolded proteins and endoplasmic reticulum (ER) stress. Negative regulators of stress  
39 signaling, such as *EDR1*, ensure that stress responses are properly suspended when they are  
40 not needed. Here, we describe the role of an uncharacterized N-terminal acetyltransferase,  
41 *NAA50*, in the regulation of plant development and stress responses. Our results demonstrate  
42 that *NAA50*, an interactor of *EDR1*, plays an important role in regulating the tradeoff between  
43 plant growth and defense. Plants lacking *NAA50* display severe developmental defects as well  
44 as induced stress responses. Reduction of *NAA50* expression results in arrested stem and root  
45 growth and senescence. Furthermore, our results demonstrate that *EDR1* and *NAA50* are  
46 required for suppression of ER stress signaling. This work establishes that *NAA50* is essential for  
47 plant development and the suppression of stress responses, likely through the regulation of ER  
48 stress. These experiments demonstrate a role for N-terminal acetylation in the suppression of ER  
49 stress, as well as the tradeoff between stress responses and development.

50

51

## 52 Introduction

53 As sessile organisms, plants frequently encounter and respond to stress conditions such  
54 as drought, salinity, heat, and microbial infection. Various adaptations enable plants to defend  
55 themselves against these stresses, however, they often come at a significant cost (Cipollini et al.,  
56 2014). Plant defense responses require significant sacrifices by infected cells and tissues, which  
57 can negatively impact plant growth. The Hypersensitive Response (HR), a form of programmed  
58 cell death, is a primary mode of defense for infected plant cells (Greenberg and Yao, 2004). Thus,  
59 plants must carefully tailor their defense responses to conserve energy for growth and  
60 reproduction (Huot et al. 2014). This tradeoff is exhibited by enhanced resistance mutants such  
61 as *snc1-1* and *cpr1* which have constitutively active defense responses and are dwarfed (Li et al.  
62 2001; Bowling et al., 1994).

63 Stress responses place strain upon the cellular machinery, which can result in  
64 endoplasmic reticulum (ER) stress (Bao and Howell, 2017). ER stress can occur during biotic or  
65 abiotic stress, as well as during normal developmental processes that place increased demands  
66 on the protein translation and protein secretion machinery (Vitale and Boston, 2008). Response  
67 to ER stress is mediated by the unfolded protein response (UPR), which occurs in two phases.  
68 The first phase aims to alleviate ER stress through increased expression of chaperones, removal  
69 and degradation of misfolded proteins from the ER, and reduction of protein translation (Williams  
70 et al., 2014; Liu and Howell, 2010). If these attempts are unsuccessful, the UPR transitions into a  
71 pro-apoptotic phase (Woehlbier and Hetz, 2011; Walter and Ron, 2011; Srivastava et al., 2018).  
72 Recent studies have demonstrated that UPR genes are required for plant growth and  
73 development (Kim et al., 2018; Bao et al., 2019). On the other hand, mutations that constitutively  
74 activate the UPR cause dwarfism (Iwata et al., 2018). Just as stress responses to external stimuli  
75 must be regulated to ensure proper growth and development, so must responses to internal stress  
76 and the UPR.

77 We have previously identified and characterized the *EDR1* gene and demonstrated its role  
78 in negatively regulating plant stress response signaling (Frye and Innes, 1998; Christiansen et  
79 al., 2011; Serrano et al., 2014). In particular, *EDR1* negatively regulates the salicylic acid (SA)  
80 and ethylene pathways (Frye et al., 2001; Tang et al., 2005). Mutant *edr1* plants display enhanced  
81 sensitivity to a variety of stimuli, including drought, pathogen infection, abscisic acid (ABA), and  
82 ethylene (Frye and Innes, 1998; Frye et al., 2001; Tang et al., 2005; Wawrzynska et al., 2008).  
83 The variety of *edr1*-related phenotypes implies that *EDR1* function impacts a diversity of plant  
84 stress responses. Interestingly, *edr1* plants appear phenotypically wildtype in the absence of

85 external stresses. This transitory requirement of *EDR1* indicates that it is functionally active only  
86 after a stress response has been induced.

87         There remain many unanswered questions regarding EDR1 function. EDR1 is believed to  
88 negatively regulate KEG, an E3 ubiquitin ligase required for post-embryonic development and  
89 endomembrane trafficking (Wawrzynska et al., 2008; Gu and Innes, 2011; Gu and Innes, 2012).  
90 However, it is unclear whether EDR1 itself is a regulator of development or endomembrane  
91 trafficking. Interestingly, EDR1 primarily localizes to the ER, yet no ER-associated function of  
92 EDR1 has been demonstrated (Christiansen et al., 2011).

93         To gain a greater understanding of EDR1 function, we performed a yeast two-hybrid  
94 screen to identify potential substrates of EDR1. These screens yielded a particularly interesting  
95 hit, At5g11340, a predicted N-terminal acetyltransferase (NAT) that bears similarity to the human  
96 Naa50 protein (Fig. 1A).

97         NATs serve as the catalytic components of larger complexes, designated as NatA-F in  
98 humans (Reviewed in Polevoda et al., 2009; Aksnes et al., 2016). Human Naa50 serves as the  
99 catalytic component of the NatE complex, which also includes the Naa10 and Naa15 subunits  
100 (Arnesen et al., 2006). Naa10, Naa15, and Naa50 are also found in the NatA complex, for which  
101 Naa10 provides catalytic function. NAT complexes mediate N-terminal acetylation (NTA), a  
102 widespread co-translational protein modification believed to affect the majority of eukaryotic  
103 proteins (Brown and Roberts, 1976; Polevoda and Sherman, 2003; Arnesen et al., 2009). These  
104 complexes target unique N-terminal sequences. Human Naa50 preferentially targets N-termini  
105 that have retained their initiator methionine and have a hydrophobic residue in the second position  
106 (Evjenth et al., 2009; Van Damme et al., 2011).

107         Based on work in yeast and humans, there is a solid biochemical understanding of how  
108 NATs function; however, the purpose of NTA is not well understood. Emerging evidence suggests  
109 that NTA serves various functions. In humans, the Golgi-localized Naa60 specifically targets  
110 transmembrane proteins and is required for the maintenance of Golgi integrity (Aksnes et al.,  
111 2015). Recent work in plants has implicated NTA in the regulation of stress responses and  
112 development. Both *NAA10* and *NAA15* are essential for plant embryonic development, and  
113 knockdown of either results in morphological defects and drought resistance (Feng et al., 2016;  
114 Linster et al., 2015). Differential NTA of the SNC1 receptor was found to have significant impacts  
115 on its activity, demonstrating a role for NTA in the regulation of defense signaling (Xu et al., 2015).  
116 Plant NATs bear strong similarity to their non-plant orthologues; however, the discovery of the  
117 plant-specific, plastid-localized NatG indicates that NTA in plants may serve unique purposes  
118 (Dinh et al., 2015). This early work demonstrates that NTA plays an important role in plant

119 physiology and stress responses. However, many aspects of plant NATs have yet to be  
120 investigated.

121 Here, we demonstrate a role for the uncharacterized *Arabidopsis* *NAA50* gene in  
122 regulating plant growth and stress responses. Using knockout and transgenic knockdown lines,  
123 we show that *NAA50* is indispensable for normal plant growth and development. Loss of *NAA50*  
124 triggers defense response pathways in *Arabidopsis*, implicating *NAA50* in the negative regulation  
125 of defense signaling. Loss of *NAA50* also induces constitutive ER stress, while loss of *EDR1* leads  
126 to enhanced sensitivity to ER stress. Thus, both *EDR1* and *NAA50* appear to be involved in the  
127 negative regulation of ER stress. This work demonstrates the importance of NTA in plant stress  
128 responses and development, as well as a potential link between NTA and ER stress.

129

## 130 **Results**

131

### 132 ***NAA50* Interacts with *EDR1***

133 To verify the initial yeast two-hybrid screen which identified *NAA50* as a potential interactor  
134 of *EDR1*, we performed additional assays to detect protein-protein interaction. To test for physical  
135 interactions between *EDR1* and potential substrates, we utilized a “substrate-trap” mutant of  
136 *EDR1*, *EDR1*<sup>ST</sup> (Gu and Innes, 2011). *EDR1*<sup>ST</sup> contains a D810A substitution in the  
137 phosphotransfer domain, which is necessary for substrate phosphorylation, thus stabilizing the  
138 potential interaction between *EDR1* and its substrates (Gibbs and Zoller, 1991). Our initial yeast  
139 two-hybrid screen was carried out using *EDR1*<sup>ST</sup> as bait. In yeast two-hybrid, *NAA50* was found  
140 to physically interact with *EDR1*<sup>ST</sup>, but not wildtype *EDR1* (Fig. 1B). This result indicates that  
141 *NAA50* may be a substrate of *EDR1*. However, immunoblotting demonstrated that wildtype *EDR1*  
142 accumulation is significantly lower than that of *EDR1*<sup>ST</sup> in yeast, potentially explaining the absence  
143 of an interaction (Fig. 1C). Co-immunoprecipitation using proteins expressed transiently in *N.*  
144 *benthamiana* demonstrated that *NAA50* physically associates with both *EDR1* and *EDR1*<sup>ST</sup> *in*  
145 *vivo*, contrasting with our yeast two-hybrid results (Fig. 1D). *EDR1* has been previously  
146 demonstrated to localize to the ER (Christiansen et al., 2011). We similarly observed an ER  
147 localization of *NAA50* tagged with mCherry when transiently expressed in *N. benthamiana* (Fig.  
148 1E). *NAA50* co-localized with the GFP-tagged ER marker SDF2 (Nekrasov et al., 2009). These  
149 experiments indicate that *EDR1* and *NAA50* physically interact, that both proteins localize to the  
150 ER, and that *NAA50* may be a substrate of *EDR1*.

151

### 152 ***Arabidopsis* *NAA50* is Highly Conserved and Essential for Development**

153           The discovery that NAA50 physically interacts with EDR1 prompted us to investigate its  
154 potential functions in *Arabidopsis*. There is a 51.25% identity match between *Arabidopsis* and  
155 human NAA50 proteins (Fig. 1A). This high degree of sequence similarity indicates that NAA50  
156 function is likely conserved between plants and animals.

157           To investigate the role of NAA50 in plants, we characterized two T-DNA insertion mutants  
158 (SAIL\_210\_A02 and SAIL\_1186\_A03), which we designated *naa50-1* and *naa50-2*. Both mutant  
159 lines were found to be severely dwarfed compared to wild-type plants (Fig. 2, A–B). Knockout  
160 *naa50* seedlings displayed abnormal and dwarfed growth (Fig. 2A). As they developed, *naa50*  
161 plants remained dwarfed and were sterile, although stems and flowers did form (Fig. 2C). We  
162 were able to fully complement the *naa50-1* mutant phenotypes by transformation of a transgene  
163 carrying NAA50 tagged with sYFP under the control of the native NAA50 promoter, demonstrating  
164 that loss of NAA50 is responsible for the dwarf phenotype and sterility (Fig. 2B). These  
165 observations establish that *NAA50* is essential for normal plant growth and development.

166

### 167 **Loss of Naa50 Alters Plant Growth**

168           In addition to being dwarfed, *naa50* seedlings displayed a variety of developmental  
169 phenotypes. Root hair growth in *naa50* plants was irregular, and root hairs were elongated (Fig.  
170 3A). This led us to hypothesize that loss of NAA50 may result in altered vacuole development.  
171 Loss of KEG, another EDR1-interacting protein, has been shown to result in altered vacuolar  
172 development (Gu and Innes, 2012). In *naa50-1* seedlings expressing the tonoplast marker  $\gamma$ TIP  
173 (Nelson et al., 2007), altered vacuole shape was observed (Fig. 3B). Many *naa50-1* vacuoles  
174 appeared fractured and contained many “blebs”, similar to those observed in *keg* mutant  
175 seedlings (Gu and Innes, 2012). Additionally, *naa50-1* root cells were larger and irregularly  
176 shaped. This could indicate that NAA50 is involved in vacuole maturation.

177           The severe dwarfing and sterility of *naa50-1* homozygous mutant plants compromised our  
178 ability to study the role of *NAA50* in later stages of plant development. To overcome this limitation,  
179 we generated inducible knockdown plants based on the expression of an artificial microRNA  
180 (amiRNA) driven by a dexamethasone-inducible promoter (DEX:NAA50-ami). We identified two  
181 independent transgenic lines carrying this construct which displayed a significant knockdown of  
182 *NAA50* as early as 16 hours after dexamethasone treatment (Fig. 3C). As a control, we utilized a  
183 scrambled amiRNA line (DEX:Scrambled-ami), which contains a dexamethasone-inducible  
184 amiRNA with no predicted targets.

185           Knockdown of *NAA50* in the DEX:Naa50-ami plants resulted in severe morphological  
186 changes. Growth of DEX:NAA50-ami seedlings on MS media supplemented with dexamethasone

187 increased the length of root hairs, recapitulating the *naa50* root hair phenotype (Fig. 3D).  
188 Additionally, dexamethasone treatment caused DEX:NAA50-ami seedlings to grow significantly  
189 slower than the control lines, resulting in shorter roots (Fig. 3E). *NAA50* knockdown also elicited  
190 changes in stem growth. 24 hours after dexamethasone treatment, the stems of DEX:NAA50-ami  
191 plants bent approximately 90° (Fig. 3F). As in the roots, dexamethasone treatment completely  
192 halted any growth of the primary stem in DEX:NAA50-ami plants (Fig. 3G). Interestingly, this shoot  
193 bending phenotype was suppressed by removal of the shoot apical meristem prior to  
194 dexamethasone treatment (Fig. 3H), suggesting that the bending phenotype is dependent on  
195 auxin redistribution. Our observations of knockout and knockdown plants confirm that *NAA50* is  
196 essential for normal plant growth and development.

197

### 198 **Loss of Naa50 Triggers Cell Death**

199 As well as inducing growth changes, knockdown of *NAA50* caused early senescence in  
200 leaves. Leaves of adult DEX:NAA50-ami plants turned yellow and became necrotic following  
201 dexamethasone treatment (Figure 4A). Senescence also occurred in DEX:NAA50-ami seedlings  
202 after transfer to MS plates supplemented with dexamethasone (Fig. 4B). In both adults and  
203 seedlings, the senescence phenotype developed about 4 days after the initial dexamethasone  
204 treatment, long after the changes in growth rate and stem bending occurred.

205 The discovery that knockdown of *NAA50* induces cell death prompted us to investigate  
206 whether loss of *NAA50* results in cell death in *naa50-1* seedlings. Indeed, roots of *naa50-1* and  
207 *naa50-2* seedlings were readily stained by trypan blue dye, indicating that loss of *NAA50* leads to  
208 the accumulation of dead cells in roots (Fig. 4C). Trypan blue staining of *naa50* roots was spotty  
209 and irregular, indicating that only a subset of *naa50* root cells died (Fig. 4D). Taken together,  
210 these results demonstrate that in addition to being essential for plant development, *NAA50* is also  
211 required for the repression of cell death and senescence.

212 Given the interaction between *EDR1* and *NAA50*, we hypothesized that introduction of the  
213 *edr1-1* allele into *NAA50* knockdown plants may affect the senescence phenotype. However, we  
214 did not observe any major change in the senescence phenotype when *edr1-1* was introduced  
215 (Fig. 4E). That the *edr1-1* mutation did not enhance or suppress the senescence phenotype  
216 indicates that *NAA50* and *EDR1* may regulate senescence through a shared mechanism.

217

### 218 **Loss of Naa50 Represses Growth and Induces Stress Signaling**

219 The discovery that knockdown of *NAA50* triggers changes in plant growth and senescence  
220 prompted us to investigate the transcriptional changes taking place in these plants. We therefore

221 conducted an RNA sequencing-based analysis of the DEX:NAA50-ami transcriptome. Four-  
222 week-old plants were treated with dexamethasone, and RNA was collected 0, 12, and 24 hours  
223 later. The scrambled amiRNA line was utilized as a control. This design enabled a comparison of  
224 the DEX:NAA50-ami transcriptome at various time points, while excluding potential off-target  
225 effects of dexamethasone treatment or amiRNA overexpression.

226 Our RNA sequencing analysis indicated that *NAA50* knockdown resulted in altered  
227 expression of approximately 2,000 genes by 12 hours post-dexamethasone application  
228 (Supplemental Datasets). To determine the biological processes most impacted by loss of  
229 *NAA50*, we analyzed the biological gene ontology (GO) term enrichment in the 12 and 24 hour  
230 DEX:NAA50-ami datasets. This analysis demonstrated that *NAA50* knockdown leads to  
231 upregulation of genes involved in stress hormone signaling, as well as biotic and abiotic stress  
232 responses, while causing downregulation of a variety of plant growth and photosynthetic  
233 processes (Fig. 5A). In particular, transcripts of genes involved in photosynthesis, light responses,  
234 and growth hormone responses were negatively impacted. These changes in expression  
235 correlate with the altered development and induced senescence phenotypes observed during  
236 *NAA50* knockdown.

237 To further analyze our transcriptome data, we searched for studies that had identified  
238 similar transcriptional changes using the Genevestigator Signature tool (Hruz et al., 2008). We  
239 selected the most significantly altered transcripts within the 12 hour DEX:NAA50-ami dataset, and  
240 searched for studies that displayed similar expression profiles. We found that the most similar  
241 expression profiles were those of studies investigating plant pathogen interactions, or light stress  
242 (Fig. 5B). This overlap demonstrates that *NAA50* knockdown elicits stress signaling in plants.

243

#### 244 ***Naa50* and *EDR1* Repress ER Stress**

245 We have previously found that plants lacking *EDR1* display an enhanced ER stress  
246 phenotype (unpublished). To verify this, we tested *edr1-1* plants for ER stress sensitivity by  
247 injecting leaves with tunicamycin (TM), an inhibitor of protein glycosylation that induces ER stress.  
248 Injected regions of *edr1-1* leaves senesced more rapidly than wild-type leaves (Figure 6A). This  
249 observation suggests that *EDR1* is required for proper execution of the unfolded protein response,  
250 or that loss of *EDR1* results in enhanced cell death signaling during ER stress signaling.

251 NTA has been shown to alter protein stability, localization, and transport (Arnesen, 2011).  
252 This raised the question of whether loss of NAA50-mediated NTA may lead to induction of ER  
253 stress. Indeed, many of the observed *naa50*-mediated developmental phenotypes, such as  
254 stunted growth and cell death, can be caused by ER stress. Treatment with TM or dithiothreitol



255 (DTT), which reduces disulfide bonds and induces ER stress, resulted in shorter roots, increased  
256 root hair length, and altered cell morphology in wild-type seedlings (Fig. 6, B–C). Additionally, TM  
257 and DTT treatments resulted in root cell death like that observed in *naa50* seedlings (Fig. 6D).  
258 These results demonstrate that ER stress treatment and loss of *NAA50* produce similar  
259 physiological changes.

260 To test whether *naa50* seedlings display constitutive ER stress responses, we measured  
261 transcription of ER stress marker genes by qPCR. *naa50-1* seedlings were found to have  
262 significantly higher levels of *BIP3* and *SEC31A* expression in the absence of any treatment (Fig.  
263 6E). When treated with TM, however, *naa50-1* seedlings displayed WT levels of *BIP3* and  
264 *SEC31A* expression. During ER stress, the transcription factor *bZIP60* undergoes splicing,  
265 leading to its activation (Deng et al., 2011). Thus, detection of the spliced form of *bZIP60* indicates  
266 an active ER stress response. Untreated *naa50-1* seedlings were found to contain significantly  
267 higher levels of spliced *bZIP60* relative to WT (Fig. 6F). However, WT levels of *bZIP60* splicing  
268 occurred in TM-treated *naa50-1*. These results demonstrate that loss of *NAA50* leads to  
269 constitutive ER stress, but not an increase in maximum ER stress response signaling. Thus,  
270 *EDR1* and *NAA50* both appear to play important roles in regulating ER stress in plants.

271

## 272 **Naa50 Enzymatic Activity is Required for Development**

273 Given the high sequence conservation between *Arabidopsis* and human NAA50 proteins  
274 (Fig. 1A), we hypothesized that the enzymatic activity of NAA50 would be conserved. In addition  
275 to functioning as an N-terminal acetyltransferase, human Naa50 has been shown to be capable  
276 of auto-acetylation (Evjenth et al., 2009). We therefore tested NAA50 for auto-acetylation activity  
277 using recombinant NAA50 protein. *In vitro* auto-acetylation assays using recombinant NAA50  
278 protein demonstrated that *Arabidopsis* NAA50 is indeed capable of auto-acetylation (Fig. 7A).

279 Human Naa50 has previously been shown to associate with the NatA complex, which  
280 includes the Naa10 subunit (Arnesen et al., 2006). Transient expression of sYFP-tagged  
281 *AtNAA50* with mCherry-tagged *AtNAA10* indeed demonstrated that these proteins co-localize in  
282 plants (Fig. 7B).

283 Based on the sequence conservation between *Arabidopsis* NAA50 and human Naa50, as  
284 well as the co-localization of *AtNAA50* with *AtNAA10*, we hypothesized that *AtNAA50* likely  
285 functions as an N-terminal acetyltransferase. To determine whether NAA50 is active in N-terminal  
286 acetylation, we tested whether various loss of function NAA50 mutants could complement *naa50-*  
287 *2* mutant phenotypes. *naa50-2* plants were transformed with NAA50<sup>Y34A</sup>-HA and NAA50<sup>I145A</sup>-HA.  
288 It has been demonstrated that the comparable Y31A and I142A mutations in human Naa50

289 reduce enzyme efficiency to below 10% and 42.2% of wild-type levels, respectively (Liszczak et  
290 al., 2011).

291 We were able to identify numerous transgenic lines expressing both the Y34A and I145A  
292 proteins (Fig. 7C). Following transformation with the NAA50<sup>I145A</sup>-HA transgene, we observed that  
293 the *naa50* root phenotype was not fully complemented in the transgenic lines, as roots retained  
294 their dwarf phenotype and altered cell morphology (Fig. 7, D-E). Despite retaining the *naa50* root  
295 phenotypes, some NAA50<sup>I145A</sup> lines did not display the *naa50* dwarfism phenotype and had  
296 wildtype-sized rosettes (Fig. 7F). However, even when NAA50<sup>I145A</sup> transgenic plants had wildtype-  
297 sized rosettes, they did not develop normal siliques or produce viable seed (Fig. 7G). The more  
298 severe NAA50<sup>Y34A</sup> mutant also did not fully rescue *naa50-2* plants. NAA50<sup>Y34A</sup> transgenic plants  
299 did not have normal roots or rosettes and were infertile (Fig. 7, D-F). Although the Y34A transgene  
300 was able to partially complement the rosette dwarfism, it was not able to fully complement the  
301 phenotype (Fig. 7F). For both the I145A and Y34A transgenic lines, we observed a correlation  
302 between NAA50 protein accumulation and rosette size (Fig. 7, C, F). The inability of NAA50<sup>I145A</sup>  
303 and NAA50<sup>Y34A</sup> transgenes to fully rescue *naa50-2* plants demonstrates the importance of NAA50-  
304 mediated NTA in plant growth and development. That the NAA50<sup>I145A</sup> mutant was able to  
305 complement the rosette dwarfism, but not the root phenotypes or sterility demonstrates that  
306 NAA50-mediated NTA may be especially required for the growth and development of roots as  
307 well as fertility.

308

## 309 Discussion

### 310 **NAA50 is Required for Growth and the Suppression of Stress Responses**

311 The investigation of NTA in regulating cell signaling in eukaryotes is still in its infancy, and  
312 identification and characterization of all plant NATs is incomplete. Our understanding of how NATs  
313 function comes primarily from work in human cell culture and yeast. However, recent work in  
314 plants has demonstrated a role for NTA in regulating diverse processes (Linster et al., 2015; Xu  
315 et al., 2015). Post-translational modification of proteins has long been appreciated as a  
316 mechanism by which cell signaling and crosstalk is regulated (Hunter, 2007). NTA may provide a  
317 mechanism by which plants regulate responses to external and internal stress signals at the  
318 translational level.

319 With this work, we have begun to characterize the role of *Arabidopsis* NAA50 in regulating  
320 plant development and stress responses. Complete loss of NAA50 results in severely dwarfed  
321 and sterile plants, as well as altered root morphology. By using hormone-inducible amiRNA  
322 transgenic plants, we demonstrated that NAA50 knockdown results in reduced expression of

323 developmental process and inhibits growth. Taken together, these results indicate that *NAA50* is  
324 required for plant growth and development.

325 Our work adds to growing evidence that NATs are required for plant development. *NAA10*  
326 and *NAA15* have previously been demonstrated to be essential for development. Loss of function  
327 mutations in *NAA10* or *NAA15* are embryonic lethal (Linster et al., 2015; Feng et al., 2016), while  
328 partial loss of *NAA15* results in dwarfism and enhanced defense signaling (Xu et al., 2015).  
329 Knockdown of *NAA10* and *NAA15* alters root morphology, enhances the growth of the primary  
330 root and inhibits the growth of lateral roots (Linster et al., 2015). Although NatA and NatE are  
331 required for proper development, loss of NatB is less severe (Ferrandez-Ayela et al., 2013; Xu et  
332 al., 2015). Similarly, loss of *NAA30*, the catalytic component of NatC, does not result in lethality  
333 in plants. It does, however, result in minor dwarfism as well as defects in photosystem II efficiency  
334 (Pesaresi et al., 2003). The range of developmental phenotypes resulting from mutations in NATs  
335 demonstrate that NATs differ in their involvement in plant development.

336 Our results demonstrate that loss of *NAA50* results in the activation of plant stress  
337 signaling. Knockdown of *NAA50* elicits senescence in adults as well as seedlings, while the roots  
338 of *naa50* seedlings contain an abundance of dead cells. Gene expression analysis confirmed that  
339 knockdown of *NAA50* results in an upregulation of defense signaling.

340 NATs appear to play unique roles in the regulation of plant stress responses. Loss of NatA  
341 has been shown to increase drought tolerance (Linster et al., 2015). The NatA and NatB  
342 complexes have been previously implicated in the regulation of the NLR protein SNC1 (Xu et al.,  
343 2015). Partial loss of *NAA15* results in increased stability and accumulation of SNC1, as well as  
344 enhanced defense signaling and resistance. Interestingly, loss of NatB leads to decreased  
345 accumulation of SNC1, and suppression of *snc1*-induced dwarfism (Xu et al., 2015). Our  
346 observations demonstrate that loss of NatE has a similar effect as the loss of NatA in plants,  
347 indicating that both are required for the suppression of defense signaling in the absence of  
348 external stress.

349 In addition to its role in negatively regulating defense signaling, our results implicate  
350 *NAA50* in the repression of ER stress. The developmental defects observed in *naa50* plants can  
351 be recapitulated by TM and DTT treatment, indicating that they may result from constitutive  
352 activation of ER stress responses. In support of this hypothesis, we observed increased  
353 expression of ER stress genes and *bZIP60* splicing in untreated *naa50* seedlings (Fig. 6).  
354 Following TM treatment, *naa50-1* seedlings displayed WT levels of ER stress signaling.  
355 Therefore, loss of *Naa50* induces ER stress signaling, but does not lead to greater induction  
356 during TM treatment. Additionally, the expression of *BIP3* and *SEC31A* in *naa50-1* seedlings was

357 significantly lower in the absence of TM than during TM treatment. This indicates that the level of  
358 constitutive ER stress which occurs in *naa50-1* plants is significantly lower than that elicited by  
359 chemical treatment. Based on these results, we believe that NAA50 is required for the prevention  
360 of protein misfolding and aggregation, which contribute to ER stress. Plant NATs have not  
361 previously been demonstrated to play a role in the regulation of ER stress. Although NatE seems  
362 to be required for the repression of ER stress, it is possible that other NAT complexes may be  
363 required as well.

364 Our results demonstrate that NAA50-mediated NTA is likely required for plant  
365 development. Although we were unable to detect NAA50-mediated NTA *in vivo*, our  
366 complementation experiments demonstrate that the NAA50<sup>I145A</sup> and NAA50<sup>Y34A</sup> mutations, which  
367 inhibit NTA activity, prevent the NAA50 transgene from fully complementing *naa50* plants. This  
368 demonstrates an essential role for NAA50-mediated NTA in root development and fertility.

369

### 370 **NTA May Regulate ER Stress**

371 The enzymatic function of human Naa50 has been demonstrated previously (Liszczak et  
372 al., 2011; Van Damme et al., 2011; Reddi et al., 2016; Evjenth et al., 2009). A high degree of  
373 conservation has been demonstrated for other NATs. For instance, human NatA can complement  
374 yeast NatA mutants (Arnesen et al., 2009). Based on the high level of sequence similarity between  
375 *Arabidopsis* and human Naa50, it is probable that enzymatic function is conserved. We were able  
376 to detect auto-acetylation of recombinant *Arabidopsis* NAA50 *in vitro*, demonstrating that it is  
377 indeed a functional acetyltransferase (Fig. 7). In addition, we found that mutations that alter  
378 NAA50 NTA activity prevent complementation of *naa50* mutant phenotypes (Fig. 7). As in other  
379 organisms, *Arabidopsis* NAA50 localizes primarily to the ER (Fig. 1, Fig. 7B). These similarities  
380 to other Naa50 proteins demonstrate that NAA50 likely functions as an NTA in plants.

381 There is evidence from human and yeast systems for the involvement of NATs in  
382 responding to ER stress and protein aggregates. NTA is known to contribute to protein stability,  
383 trafficking, and translocation to the ER (Arnesen, 2011; Forte et al., 2011). The NatA complex has  
384 been implicated in the regulation of protein aggregation (Arnesen et al., 2010). HYPK, a NatA  
385 component, has chaperone activity, and has been shown to inhibit the formation of protein  
386 aggregates (Raychaudhuri et al., 2007). Loss of NatA components in yeast results in  
387 compromised heat shock sensitivity and signaling, indicating a potential role for NTA in regulating  
388 heat shock (Gautschi et al., 2003; Das and Bhattacharyya, 2016). There is an established link  
389 between the UPR and heat stress responses in plants. Heat shock can induce protein aggregation  
390 and ER fragmentation (Richter et al., 2010). During heat stress, the UPR is activated and ensures

391 proper reproductive development (Deng et al., 2011; Deng et al., 2016). We have demonstrated  
392 that loss of *NAA50* in plants results in constitutive ER stress, adding additional evidence that NTA  
393 is involved in the repression of protein aggregation and ER stress.

394         There is a well-established link between ER stress, the UPR, and defense signaling in  
395 plants. Plants carrying loss of function mutations in the stearoyl-ACP desaturase *SS/2* exhibit  
396 dwarfism, enhanced accumulation of ER stress marker BiP3, and higher PR-1 expression (Iwata  
397 et al., 2018; Kachroo et al., 2001). This mirrors the increased biotic and ER stress signaling  
398 observed in *naa50* plants. Mutants lacking UPR regulators IRE1 and bZIP60 display enhanced  
399 susceptibility to bacterial pathogens, demonstrating a link between the UPR and SA-based  
400 defense signaling (Moreno et al., 2012). If ER stress cannot be properly maintained, the UPR  
401 shifts into a cell death phase (Woehlbier and Hetz, 2011; Walter and Ron, 2011). A recent  
402 investigation of the transcriptional changes that occur during a prolonged UPR demonstrated that  
403 transcripts associated with biotic stress responses are elicited during the UPR (Srivastava et al.,  
404 2018). Biotic stress signaling is also impacted by the ER Quality Control (ERQC) pathway. The  
405 membrane-bound receptors upon which plant defense signaling relies undergo maturation  
406 through the ERQC pathway. Impairment of ERQC machinery can result in enhanced  
407 susceptibility, as the receptors required for pathogen recognition are unable to function (Tintor  
408 and Saijo, 2014). Thus, compromised ER integrity can hinder plant pathogen responses.  
409 Unsurprisingly, plant pathogens have been found to attack the host ER for their own benefit. The  
410 mutualistic fungus *Piriformospora indica* induces cell death using an ER stress-dependent  
411 mechanism, enabling its colonization of the *Arabidopsis* root (Qiang et al., 2012). The high degree  
412 of overlap between ER stress and biotic stress responses opens the possibility that the observed  
413 increase in stress signaling in *NAA50* knockout and knockdown plants results from changes to  
414 ER stress, rather than direct regulation of stress responses by *NAA50*.

415         A link between NTA and osmotic stress in plants has been recently proposed (Linster et  
416 al., 2015; Asknes et al., 2016). It was demonstrated that NatA knockdown plants display  
417 enhanced drought tolerance. Furthermore, levels of NatA-mediated NTA were shown to fluctuate  
418 in response to ABA treatment (Linster et al., 2015). Here, we have demonstrated that plant NATs  
419 may be required for proper protein folding and the repression of ER stress. There is a  
420 demonstrated link between ER stress and osmotic stress in plants. Overexpression of the  
421 chaperone BiP in tobacco and soybean results in enhanced drought tolerance (Valente et al.,  
422 2008). BiP expression in soybean was found to inhibit both ER- and osmotic stress-induced cell  
423 death (Reis et al., 2011). In wheat, treatment with Tauroursodeoxycholic Acid alleviates osmotic  
424 stress-induced cell death and ER stress signaling (Zhang et al., 2017). Strong osmotic stress

425 alters root architecture and induces cell death through an ER stress-dependent mechanism (Duan  
426 et al., 2010).

427 If NTA is indeed required to prevent induction of ER stress, then the enhanced drought  
428 resistance of NAT-deficient plants may be an indirect result of changes to ER stress signaling.  
429 We have demonstrated that loss of *NAA50* alters root morphology, resulting in shorter roots,  
430 longer root hairs, and the accumulation of dead cells. Furthermore, these changes appear to be  
431 the result of constitutive ER stress. Constitutive ER stress resulting from reduction in NAT  
432 expression may lead to priming of stress responses, which ultimately results in a resistance  
433 phenotype. Thus, the enhanced drought tolerance of NatA knockdown plants observed by Linster  
434 et al. 2015 may result from enhanced ER stress and UPR signaling, rather than a direct effect on  
435 osmotic stress responses.

436 Although loss of *NAA50* has a significant impact on *Arabidopsis* development, it does not  
437 result in lethality, as in *Naa10* and *Naa15* knockouts (Linster et al., 2015; Feng et al., 2016). This  
438 indicates potential redundancy for NAA50-mediated NTA, or that NAA50 is only essential for  
439 certain developmental processes. Human NatE, NatC, and NatF target a common set of N-  
440 terminal peptides (Aksnes et al., 2016). Given this overlap of function, other NATs may be capable  
441 of acetylating NatE targets in its absence. Although NatF has been characterized in humans, no  
442 ortholog of the NatF catalytic component Naa60 exists in yeast or *Arabidopsis*. A BLAST search  
443 using the human Naa60 sequence returns NAA50 as the most similar *Arabidopsis* protein. It is  
444 unclear whether *Arabidopsis* NAA50 can function similarly to NatF. NAA50 does not appear to  
445 have the same Golgi localization as human Naa60 (Aksnes et al., 2015), as we observed it  
446 primarily localizing to the ER (Fig. 1E). NatC may be able to fulfill some functions for NatE,  
447 however, loss of function mutations in *Arabidopsis* NatC are less severe than that of NatE,  
448 producing only minor dwarf phenotypes (Pesaresi et al., 2003).

449 Most work on NTA has been performed in unicellular organisms, making it impossible to  
450 study whether NATs display tissue-specific functions. There are likely to be differences in the  
451 expression patterns of NATs in different tissues. According to the BAR ePlant browser  
452 (<http://bar.utoronto.ca/eplant>), root expression of NAA50 and NAA10 is predicted to be the highest  
453 in the meristematic region. It is likely that some NAT complexes are specifically active at certain  
454 developmental periods, or in specific tissues. If other plant NAT complexes are indeed able to  
455 fulfill some functions of NAA50, it is also possible that they are only able to do so in certain tissues  
456 or at certain points in development, based upon their own expression profiles. The study of plant  
457 NATs has the potential to expose tissue- and development-specific NAT activity.

458           Loss of *NAA50* especially affected certain cell types and tissues. In *NAA50* knockdown  
459 plants, loss of *NAA50* led to reduced growth of both roots and stems. Furthermore, stem bending  
460 and altered root morphology were observed. The use of an inducible knockdown line enabled us  
461 to compare the effects of *NAA50* knockdown in new and old cells. Interestingly, phenotypes  
462 resulting from *NAA50* knockdown were mainly exhibited in newly developed cells. The sterility of  
463 *naa50* plants demonstrates that *NAA50* is required for reproductive as well as vegetative  
464 development. These observations demonstrate that *NAA50* activity may be especially required  
465 by developing cells, or cells undergoing rapid growth and division.

466           If *NAA50* is indeed required for the regulation of ER stress, it follows that roots, shoots,  
467 and anthers would be especially impacted by its loss. There is evidence that plant vegetative and  
468 reproductive development require an intact UPR to manage ER stress. Roots have been shown  
469 to be particularly sensitive to ER stress (Cho and Kanehara, 2017). Significant changes in root  
470 and shoot development result from mutations in UPR genes, indicating that a functional UPR is  
471 essential for vegetative development (Deng et al., 2013; Kim et al., 2018; Bao et al., 2019).  
472 Mutations in UPR genes also have a significant impact on plant reproductive development (Deng  
473 et al., 2013; Deng et al., 2016). In fact, the UPR is constitutively active in anthers (Iwata et al.,  
474 2008). The requirement for UPR signaling in unstressed plants implies that ER stress occurs  
475 during normal development and must be managed by the UPR, or that UPR genes are involved  
476 in the direct regulation of developmental genes (Kim et al., 2018). A requirement for the UPR in  
477 development has long been demonstrated in animals. The rapid production of immunoglobulins  
478 by B cells is preceded by an upregulation of the UPR, which manages potential ER stress (van  
479 Anken et al., 2003). Roots, shoots, and anthers may rely upon UPR signaling due to the high level  
480 of protein translation which occurs in these tissues during development. That these tissues were  
481 indeed particularly affected by the loss of *NAA50* demonstrates that *NAA50* may be required for  
482 the management of ER stress which occurs during development.

483

#### 484 **Model for EDR1 and *NAA50* Regulation of ER Stress**

485           Our initial interest in *NAA50* was based on its physical interaction with EDR1. Indeed, the  
486 enhanced defense signaling observed in *NAA50* knockout and knockdown plants correlates with  
487 many *edr1* phenotypes. *EDR1* and *NAA50* also appear to play a role in the regulation of ER  
488 stress. *edr1* plants were found to have enhanced sensitivity to TM treatment, while loss of *NAA50*  
489 induced constitutive ER stress.

490           Our work indicates that EDR1 and *NAA50* may be involved in the repression of ER stress  
491 (Fig. 8). Since *NAA50* likely functions primarily in the NTA of target peptides, loss of *NAA50* may

492 result in the translation of proteins which lack a required N-terminal acetylation mark. Loss of  
493 NAA50-mediated NTA likely results in the misfolding, improper trafficking, or aggregation of  
494 proteins, ultimately producing ER stress. We have found that loss of EDR1 results in increased  
495 ER stress sensitivity. It is possible that EDR1 activates NAA50, perhaps during a stress event.  
496 Thus, when plants lacking EDR1 encounter stress, NAA50 would lack proper activation. The lack  
497 of NAA50-mediated NTA would therefore lead to mild ER stress, ultimately resulting in enhanced  
498 senescence and cell death. This model provides a potential explanation for the wide range of  
499 stimuli to which *edr1* plants display enhanced senescence and sensitivity.

500

## 501 **Material and Methods**

502

### 503 **Plant material and growth conditions**

504 *Arabidopsis thaliana* accession Col-0, and Col-0 mutants *edr1-1* (Frye and Innes 1998),  
505 *naa50-1* (SAIL\_210\_A02), and *naa50-2* (SAIL\_1186\_A03) were used in this study.

506 For growth on Murashige and Skoog (MS) plates, seeds were surface sterilized with a  
507 solution of hydrogen peroxide and ethanol (1:19) and planted on one-half-strength MS plates  
508 supplemented with 0.8% agar. For soil-grown plants, seed was directly sowed onto Pro-Mix PGX  
509 Biofungicide plug and germination mix supplemented with Osmocote 14-14-14 fertilizer (ICL  
510 Fertilizers). Plates and flats were placed at 4°C for 48 hours for stratification before being  
511 transferred to a growth room set to 23°C and 12 hour light (150  $\mu$ Em-2s-1)/12 hour dark cycle.  
512 For transient expression experiments, *Nicotiana benthamiana* was grown under the same growth  
513 room conditions as *A. thaliana*.

514

### 515 **Plasmid construction and generation of transgenic *Arabidopsis* plants**

516 *NAA50* clones were derived by PCR amplification using cDNA from Col-0. Site-directed  
517 mutagenesis was utilized to introduce the I145A and Y34A mutations into *NAA50* (Qi and  
518 Scholthof, 2008). All primers used in this study for cloning and site-directed mutagenesis are listed  
519 in Supplementary Table S1.

520 For yeast-two hybrid assays, the full-length open reading frames of EDR1, EDR1 (D810A),  
521 and Lamin (LAM) were cloned into the DNA-binding domain vector pGBKT7 (Clontech  
522 Matchmaker System). The full-length open reading frame of NAA50, and the SV40 Large T  
523 Antigen (T) were cloned into pGADT7. EDR1 full-length wild-type cDNA and EDR1<sup>ST</sup> (D810A)  
524 were cloned into pGBKT7 using SmaI and Sall restriction sites. NAA50 was cloned into pGADT7  
525 using Clal and XhoI restriction sites.



526 For transient expression in *N. benthamiana*, NAA50 was cloned into the cauliflower  
527 mosaic virus 35S promoter vector pEarleyGate100 (Earley et al. 2006) using a modified multisite  
528 Gateway recombination cloning system (Invitrogen) as described in (Qi et al. 2012). EDR1-sYFP  
529 and EDR1<sup>ST</sup>-sYFP were cloned into the dexamethasone-inducible pBAV154 (Vinatzer et al.,  
530 2006) using multisite Gateway cloning.

531 For the generation of amiRNA transgenic plants, a NAA50-specific amiRNA construct was  
532 created by PCR amplification following the procedures of Schwab et al. (2006), which included  
533 insertion of the NAA50 sequence flanked by regions of the MIR319 microRNA. The resulting  
534 amiRNA construct was cloned into pBAV154 using Gateway cloning.

535 To generate transgenic plants containing NAA50-sYFP under the control of a native  
536 promoter, the 297 nucleotides upstream of the NAA50 start site were cloned into PMDC32 (Qi  
537 and Katagiri, 2009) using KpnI and HindIII restriction sites. NAA50<sup>I145A</sup> and NAA50<sup>Y34A</sup> were  
538 generated using site-directed mutagenesis (Qi and Scholthof, 2008), and cloned into  
539 pEarleyGate100 (Earley et al., 2006) with a C-terminal 3xHA tag using multisite Gateway cloning.

540 Transgenic plants were generated using the floral dip method (Clough and Bent, 1998).  
541 Plasmids were transformed into *Agrobacterium* strain GV3101 (pMP90) by electroporation with  
542 selection on Luria-Bertani plates containing 50 µg/mL kanamycin sulfate (Sigma-Aldrich) and 20  
543 µg/mL gentamicin (Gibco). Selection of transgenic plants carrying a BASTA resistance cassette  
544 was performed by spraying 1-week old seedlings with 300 µM BASTA (Finale), or by selection on  
545 MS plates supplemented with 300 µM BASTA. Selection of plants carrying a hygromycin  
546 resistance cassette was performed by germinating seed on MS plates supplemented with 20  
547 µg/mL hygromycin (Fischer Scientific).

548 For expression in *E. coli*, NAA50 was cloned into pDEST17 using Gateway cloning. The  
549 resulting plasmid was transformed into *E. coli* strain BL21.AI (Invitrogen).

550

### 551 **Yeast two-hybrid assays**

552 For yeast two-hybrid assays between EDR1 and NAA50, pGBKT7 and pGADT7 clones  
553 were transformed into haploid yeast strain AH109 (Clontech) by electroporation and selected on  
554 SD-Trp-Leu medium. Successful transformants were selected after 48 hours of growth at 30°C  
555 and then struck onto fresh SD-Trp-Leu medium and allowed to grow for another 48 hours. Before  
556 carrying out yeast two-hybrid assays, yeast was grown in liquid SD-Trp-Leu medium for 16 hours  
557 at 30°C. Cultures were re-suspended in water to an OD<sub>600</sub> of 1.0, serially diluted, and plated on  
558 appropriate SD media. Plates were grown for up to 4 days at 30°C.

559

## 560 **Immunoprecipitations and immunoblots**

561 For total protein extraction, tissue was ground in lysis buffer (50 mM Tris-HCl, pH 7.5, 150  
562 mM NaCl, 0.1% Nonidet P-40, 1% Plant Proteinase Inhibitor Cocktail [Sigma], and 50 mM 2,2'-  
563 Dithiodipyridine [Sigma]) or, for co-IPs, IP Buffer (50 mM Tris, pH 7.5, 150 mM NaCl, 1mM EDTA,  
564 0.1% Nonidet P-40, 10% glycerol, 1% Plant Proteinase Inhibitor Cocktail [Sigma], and 50 mM  
565 2,2'-Dithiodipyridine [Sigma]). For expression of dexamethasone-inducible proteins, plants were  
566 sprayed with a 50  $\mu$ M dexamethasone solution containing 0.02% (v/v) Silwet L-77 (OSi  
567 Specialties) 16 hours before tissue was harvested. Samples were centrifuged at 10,000 g at 4°C  
568 for 5 minutes, and supernatants were transferred to new tubes.

569 Immunoprecipitations were performed as described previously (Shao et al. 2003) using  
570 GFP-Trap\_A (Chromotek). Total proteins were mixed with 1 volume of 2x Laemmli sample buffer,  
571 supplemented with 5%  $\beta$ -mercaptoethanol, 1% Protease Inhibitor Cocktail (Sigma), and 50 mM  
572 2,2'-Dithiodipyridine (Sigma). Samples were then boiled for 5-10 minutes before loading. Total  
573 proteins and/or immunocomplexes were separated by electrophoresis on a 4-20% Mini-  
574 PROTEAN TGX Stain-Free protein gel (Bio-Rad). Proteins were transferred to a nitrocellulose  
575 membrane and probed with anti-HA-HRP (3F10) (Sigma), mouse anti-GFP (ab6556) (Abcam),  
576 and goat anti-mouse-HRP antibodies (A-10668) (Invitrogen).

577 For protein extraction from yeast, yeast grown on solid SD -Leu, -Trp plates were  
578 resuspended in lysis buffer (100 mM NaCl, 50 mM Tris-Cl, pH 7.5, 50 mM NaF, 50 mM Na- $\beta$ -  
579 glycerophosphate, pH 7.4, 2 mM EGTA, 2 mM EDTA, 0.1% Triton X-100, 1 mM Na<sub>3</sub>VO<sub>4</sub>). Glass  
580 beads were then added to the suspension and the solution was vortexed for 1 minute three times.  
581 After the addition of 1 volume of 2x Laemmli sample buffer supplemented with 5%  $\beta$ -  
582 mercaptoethanol, samples were boiled for 10 minutes. Immunoblots were performed using anti-  
583 HA-HRP (3F10) (Sigma), mouse anti-GAL4DBD (RK5C1) (Santa Cruz Biotechnology), goat anti-  
584 mouse-HRP (A-10668) (Invitrogen), antibodies. Visualization of immunoblots from yeast strains  
585 used in two-hybrid assay were performed using the KwikQuant Imager (Kindle Biosciences).

586

## 587 **Fluorescence and light microscopy**

588 Confocal laser scanning microscopy was performed on a Leica TCS SP8 confocal  
589 microscope (Leica Microsystems) equipped with a 63X, 1.2-numerical aperture water objective  
590 lens and a White Light Laser. sYFP fusions were excited at 514-nm and detected using a 522 to  
591 545 nm band-pass emission filter. mCherry fusions were excited at 561 nm and detected using a  
592 custom 595 to 620 nm band-pass emission filter.

593 To capture detailed images of *Arabidopsis* roots, images were captured using a Stemi 305  
594 compact Greenough stereo microscope (Zeiss). Digital images were captured using Labscope  
595 software (Zeiss).

596

### 597 **Quantitative-PCR**

598 For RT-PCR and quantitative RT-PCR experiments, RNA was extracted using the  
599 Spectrum plant total RNA kit (Sigma-Aldrich) according to manufacturer's instructions. cDNA was  
600 produced from 1 µg total RNA using the Verso cDNA synthesis kit (Thermo Fisher Scientific).  
601 Relative RNA amounts were determined by quantitative RT-PCR using the Power Up SYBR  
602 Green Master Mix (Thermo Fisher Scientific). A comparative Ct method was used to determine  
603 relative quantities (Schmittgen and Livak, 2008). ACTIN2 was used for normalization.

604

### 605 **NAA50 knockdown transcriptome profiling**

606 For RNA sequencing, plants were first sprayed with a solution containing 50 µM  
607 dexamethasone and 0.02% (v/v) Silwet L-77 (OSi Specialties) 24 hours, 12 hours, and  
608 immediately before tissue collection. Three biological replicates were performed per genotype per  
609 treatment, each consisting of approximately 0.4 g leaf tissue taken from the 4th leaf of 4 unique  
610 plants. RNA was extracted from 4-week-old *Arabidopsis* leaves using the Spectrum plant total  
611 RNA kit (Sigma-Aldrich) according to manufacturer's instructions.

612 Total RNA was prepared into equimolar pools for each sample submitted to Indiana  
613 University's Center for Genomics and Bioinformatics for cDNA library construction using a TruSeq  
614 Stranded mRNA LT Sample Prep Kit (Illumina) following the standard manufacturing protocol.  
615 Sequencing was performed using an Illumina NextSeq500 platform with 75 cycle sequencing kit  
616 generating 84bp single-end reads. After the sequencing run, demultiplexing was performed with  
617 bcl2fastq v2.20.0.422.

618 Trimmomatic (1; version 0.33; non-default parameters =  
619 ILLUMINACLIP<adapter\_file>:2:20:6 LEADING:3 TRAILING:3 SLIDINGWINDOW:4:20  
620 MINLEN:35) was used to trim reads of adapter and low-quality bases. Reads were mapped to the  
621 *Arabidopsis thaliana* genome using STAR with the final parameters (4; version 2.5.2a; --  
622 outSAMattributes All --outSAMunmapped Within --outReadsUnmapped Fastx --  
623 outFilterMultimapNmax 1 --seedSearchStartLmax 25 --chimSegmentMin 20 --quantMode  
624 GeneCounts --twopassMode Basic --outWigType wiggle --outWigStrand Unstranded --  
625 outWigNorm None --sjdbGTFtagExonParentTranscript Parent --sjdbGTFtagExonParentGene ID  
626 --outSAMtype BAM SortedByCoordinate). Read counts were determined using a custom perl

627 script. Differential expression comparisons of all features with 5 or more reads (in total across all  
628 samples) were carried out with DESeq2 (2; R package version 3.4.0) along with the IHW (3)  
629 package to adjust for multiple testing procedures.

630 Identification of significantly altered transcripts was performed by comparing  
631 'DEX:NAA50-ami' and 'DEX:Scrambled-ami' datasets. Transcripts which differed significantly  
632 (adjusted  $P$ -value < 0.05) between the 'DEX:NAA50-ami' and 'DEX:Scrambled-ami' datasets  
633 were then analyzed to determine whether expression had increased or decreased relative to the  
634 'DEX:NAA50-ami 0 hr' dataset. Those transcripts which were significantly (adjusted  $P$ -value <  
635 0.05 and  $\log_2$  fold-change > 1.5) up- or downregulated relative to the 'DEX:NAA50-ami 0 Hr'  
636 dataset were then used for GO term enrichment analysis. Gene Ontology (GO) term enrichment  
637 analysis was performed in Cytoscape using the BiNGO app (Maere et al., 2005).

638 Transcriptome similarity analysis was performed using the Genevestigator Signature tool  
639 (<https://genevestigator.com/gv/doc/signature.jsp>). For this analysis, a list of the 330 most  
640 significantly altered (greatest  $\log_2$  fold-change) transcripts at 12 hours was used as input. A  
641 heatmap comparing this input to similar transcriptomes was generated using the Heatmapper  
642 Expression tool (<http://www2.heatmapper.ca/expression>) (Babicki et al., 2016).

643

#### 644 **Trypan blue staining**

645 Trypan blue staining of *Arabidopsis* roots was performed by soaking seedlings in a  
646 solution of 10 mg/mL trypan blue (Sigma) in water for twenty minutes. Seedlings were then  
647 washed three times with deionized water.

648

#### 649 **ER stress treatments**

650 ER stress treatments of *Arabidopsis* seedlings were performed by growing seeds directly  
651 on MS plates supplemented with TM (Sigma) or DTT (Bio-Rad). For treatment of adult plants, TM  
652 was injected directly into one half of an *Arabidopsis* leaf using a needleless syringe.

653

#### 654 ***In vitro* acetylation assays**

655 *E. coli* strain BL21.AI was transformed with a pDEST17 vector carrying NAA50. 5xHIS-  
656 tagged NAA50 was purified from *E. coli* using a Nickel-His column (Sigma). A 5 mL culture was  
657 incubated at 37°C for 16 hours, and then subcultured to a final volume of 100 mL. The culture  
658 was grown until the OD<sub>600</sub> reached 0.5. Expression of NAA50 was induced by adding 1 mM IPTG  
659 and 0.2% Arabinose to the culture. The culture was then incubated at 30°C for 3 hours. Cells were  
660 then harvested and resuspended in 8 mL of Native Purification Buffer (50 mM NaH<sub>2</sub>PO<sub>4</sub>, 500

661 mM NaCl) supplemented with 8 mg lysozyme and a protease inhibitor tablet (Roche). The  
662 suspension was then incubated on ice for thirty minutes, and then sonicated. After sonication, the  
663 cell debris was pelleted by centrifugation (5,000 x g, 15 minutes) at 4°C. The Ni-NTA resin was  
664 washed twice with Native Purification Buffer and then incubated with the lysate for 1 hour at 4°C.  
665 The resin was then washed 4 times with Wash Buffer (Native Purification Buffer supplemented  
666 with 6 mM Imidazole). Fractions were eluted with Elution Buffer (Native Purification Buffer  
667 supplemented with 250 mM Imidazole).

668 For *in vitro* auto-acetylation assays, 4 µg recombinant NAA50 was incubated with 100 µM  
669 Acetyl-Coenzyme A (Roche) in a 2X acetylation buffer (50mM Tris HCl pH 7.5, 2mM EDTA,  
670 200mM NaCl, 10% Glycerol) at 30°C. Detection of auto-acetylation activity was performed  
671 through immunoblotting using acetylated lysine monoclonal antibody (1C6) (Invitrogen).

672

### 673 **Accession numbers**

674 Arabidopsis sequence data is available under the following AGI accession numbers: EDR1  
675 (At1g08720), NAA50 (At5g11340), γ-TIP (At2g36830), NAA10 (AT5G13780), SDF2  
676 (AT2G25110).

677

678

### 679 **ACKNOWLEDGMENTS**

680 We thank the Indiana University Light Microscopy Imaging Center for access to the Leica  
681 SP8 confocal microscope. We also thank James Ford and Doug Rusch from the Indiana  
682 University Center for Genomics and Bioinformatics for their work on the RNA sequencing  
683 experiment, and Reid Gohmann for assistance with ER stress assays on the *edr1* mutant.

684

### 685 **LITERATURE CITED**

686 Aksnes, H., A. Drazic, M. Marie and T. Arnesen (2016). "First Things First: Vital Protein Marks  
687 by N-Terminal Acetyltransferases." Trends in Biochemical Sciences 41(9): 746-760.

688 Aksnes, H., P. Van Damme, M. Goris, Kristian K. Starheim, M. Marie, Svein I. Støve, C. Hoel,

689 Thomas V. Kalvik, K. Hole, N. Glomnes, C. Furnes, S. Ljostveit, M. Ziegler, M. Niere, K.

690 Gevaert and T. Arnesen (2015). "An Organellar N-Acetyltransferase, Naa60, Acetylates

691 Cytosolic N Termini of Transmembrane Proteins and Maintains Golgi Integrity." Cell Reports

692 10(8): 1362-1374.

693 Arnesen, T. (2011). "Towards a Functional Understanding of Protein N-Terminal Acetylation."

694 PLOS Biology 9(5): e1001074.

- 695 Arnesen, T., D. Anderson, J. Torsvik, H. B. Halseth, J. E. Varhaug and J. R. Lillehaug (2006).  
696 "Cloning and characterization of hNAT5/hSAN: An evolutionarily conserved component of  
697 the NatA protein N- $\alpha$ -acetyltransferase complex." *Gene* 371(2): 291-295.
- 698 Arnesen, T., K. K. Starheim, P. Van Damme, R. Evjenth, H. Dinh, M. J. Betts, A. Rynningen, J.  
699 Vandekerckhove, K. Gevaert and D. Anderson (2010). "The chaperone-like protein HYPK  
700 acts together with NatA in cotranslational N-terminal acetylation and prevention of  
701 Huntingtin aggregation." *Molecular and cellular biology* 30(8): 1898-1909.
- 702 Arnesen, T., P. Van Damme, B. Polevoda, K. Helsens, R. Evjenth, N. Colaert, J. E. Varhaug, J.  
703 Vandekerckhove, J. R. Lillehaug, F. Sherman and K. Gevaert (2009). "Proteomics analyses  
704 reveal the evolutionary conservation and divergence of N-terminal acetyltransferases from  
705 yeast and humans." *Proceedings of the National Academy of Sciences* 106(20): 8157.
- 706 Babicki, S., D. Arndt, A. Marcu, Y. Liang, J. R. Grant, A. Maciejewski and D. S. Wishart (2016).  
707 "Heatmapper: web-enabled heat mapping for all." *Nucleic acids research* 44(W1): W147-  
708 W153.
- 709 Bao, Y., D. C. Bassham and S. H. Howell (2019). "A Functional Unfolded Protein Response Is  
710 Required for Normal Vegetative Development." *Plant Physiology* 179(4): 1834.
- 711 Bao, Y. and S. H. Howell (2017). "The Unfolded Protein Response Supports Plant Development  
712 and Defense as well as Responses to Abiotic Stress." *Frontiers in Plant Science* 8(344).
- 713 Bowling, S. A., A. Guo, H. Cao, A. S. Gordon, D. F. Klessig and X. Dong (1994). "A Mutation in  
714 Arabidopsis That Leads to Constitutive Expression of Systemic Acquired Resistance." *The*  
715 *Plant Cell* 6(12): 1845-1857.
- 716 Brown, J. L. and W. K. Roberts (1976). "Evidence that approximately eighty per cent of the  
717 soluble proteins from Ehrlich ascites cells are N $\alpha$ -acetylated." *Journal of Biological*  
718 *Chemistry* 251(4): 1009-1014.
- 719 Cho, Y. and K. Kanehara (2017). "Endoplasmic Reticulum Stress Response in Arabidopsis  
720 Roots." *Frontiers in Plant Science* 8(144).
- 721 Christiansen, K. M., Y. Gu, N. Rodibaugh and R. W. Innes (2011). "Negative regulation of  
722 defence signalling pathways by the EDR1 protein kinase." *Molecular Plant Pathology* 12(8):  
723 746-758.
- 724 Cipollini, D., D. Walters and C. Voelckel (2017). Costs of Resistance in Plants: From Theory to  
725 Evidence. *Annual Plant Reviews online*: 263-307.
- 726 Clough, S. J. and A. F. Bent (1998). "Floral dip: a simplified method for Agrobacterium -  
727 mediated transformation of Arabidopsis thaliana." *The Plant Journal* 16(6): 735-743.
- 728 Das, S. and N. P. Bhattacharyya (2016). "Huntingtin interacting protein HYPK is a negative

- 729 regulator of heat shock response and is downregulated in models of Huntington's Disease."  
730 *Experimental Cell Research* 343(2): 107-117.
- 731 Deng, Y., S. Humbert, J.-X. Liu, R. Srivastava, S. J. Rothstein and S. H. Howell (2011). "Heat  
732 induces the splicing by IRE1 of a mRNA encoding a transcription factor involved in the  
733 unfolded protein response in Arabidopsis." *Proceedings of the National Academy of*  
734 *Sciences of the United States of America* 108(17): 7247-7252.
- 735 Deng, Y., R. Srivastava and S. H. Howell (2013). "Protein kinase and ribonuclease domains of  
736 IRE1 confer stress tolerance, vegetative growth, and reproductive development in  
737 Arabidopsis." *Proceedings of the National Academy of Sciences* 110(48): 19633-19638.
- 738 Deng, Y., R. Srivastava, T. D. Quilichini, H. Dong, Y. Bao, H. T. Horner and S. H. Howell (2016).  
739 "IRE1, a component of the unfolded protein response signaling pathway, protects pollen  
740 development in Arabidopsis from heat stress." *The Plant Journal* 88(2): 193-204.
- 741 Dinh, T. V., W. V. Bienvenut, E. Linster, A. Feldman-Salit, V. A. Jung, T. Meinel, R. Hell, C.  
742 Giglione and M. Wirtz (2015). "Molecular identification and functional characterization of the  
743 first N $\alpha$ -acetyltransferase in plastids by global acetylome profiling." *Proteomics* 15(14):  
744 2426-2435.
- 745 Duan, Y., W. Zhang, B. Li, Y. Wang, K. Li, Sodmergen, C. Han, Y. Zhang and X. Li (2010). "An  
746 endoplasmic reticulum response pathway mediates programmed cell death of root tip  
747 induced by water stress in Arabidopsis." *New Phytologist* 186(3): 681-695.
- 748 Earley, K. W., J. R. Haag, O. Pontes, K. Opper, T. Juehne, K. Song and C. S. Pikaard (2006).  
749 "Gateway-compatible vectors for plant functional genomics and proteomics." *The Plant*  
750 *Journal* 45(4): 616-629.
- 751 Evjenth, R., K. Hole, O. A. Karlsen, M. Ziegler, T. Arnesen and J. R. Lillehaug (2009). "Human  
752 Naa50p (Nat5/San) Displays Both Protein N $\alpha$ - and N $\epsilon$ -Acetyltransferase Activity." *Journal of*  
753 *Biological Chemistry* 284(45): 31122-31129.
- 754 Feng, J., R. Li, J. Yu, S. Ma, C. Wu, Y. Li, Y. Cao and L. Ma (2016). "Protein N-terminal  
755 acetylation is required for embryogenesis in Arabidopsis." *Journal of Experimental Botany*  
756 67(15): 4779-4789.
- 757 Ferrández-Ayela, A., R. Micol-Ponce, A. B. Sánchez-García, M. M. Alonso-Peral, J. L. Micol and  
758 M. R. Ponce (2013). "Mutation of an Arabidopsis NatB N-Alpha-Terminal Acetylation  
759 Complex Component Causes Pleiotropic Developmental Defects." *PLOS ONE* 8(11):  
760 e80697.
- 761 Forte, G. M. A., M. R. Pool and C. J. Stirling (2011). "N-Terminal Acetylation Inhibits Protein  
762 Targeting to the Endoplasmic Reticulum." *PLOS Biology* 9(5): e1001073.

- 763 Frye, C. A. and R. W. Innes (1998). "An Arabidopsis Mutant with Enhanced Resistance to  
764 Powdery Mildew." *The Plant Cell* 10: 947-956.
- 765 Frye, C. A., D. Tang and R. W. Innes (2001). "Negative regulation of defense responses in  
766 plants by a conserved MAPKK kinase." *Proc Natl Acad Sci U S A.* 98: 373-378.
- 767 Gautschi, M., S. Just, A. Mun, S. Ross, P. Rücknagel, Y. Dubaquié, A. Ehrenhofer-Murray and  
768 S. Rospert (2003). "The Yeast N $\alpha$ -Acetyltransferase NatA Is Quantitatively Anchored to the  
769 Ribosome and Interacts with Nascent Polypeptides." *Molecular and Cellular Biology* 23(20):  
770 7403-7414.
- 771 Gibbs, C. S. and M. J. Zoller (1991). "Rational scanning mutagenesis of a protein kinase  
772 identifies functional regions involved in catalysis and substrate interactions." *J. Biol. Chem.*  
773 266: 8923–8931.
- 774 Greenberg, J. T. and N. Yao (2004). "The role and regulation of programmed cell death in  
775 plant–pathogen interactions." *Cellular Microbiology* 6(3): 201-211.
- 776 Gu, Y. and R. W. Innes (2011). "The KEEP ON GOING protein of Arabidopsis recruits the  
777 ENHANCED DISEASE RESISTANCE1 protein to trans-Golgi network/early endosome  
778 vesicles." *Plant physiology* 155(4): 1827-1838.
- 779 Gu, Y. and R. W. Innes (2012). "The KEEP ON GOING Protein of Arabidopsis Regulates  
780 Intracellular Protein Trafficking and Is Degraded during Fungal Infection." *The Plant Cell*  
781 24(11): 4717-4730.
- 782 Hruz, T., O. Laule, G. Szabo, F. Wessendorp, S. Bleuler, L. Oertle, P. Widmayer, W. Gruissem  
783 and P. Zimmermann (2008). "Genevestigator V3: A Reference Expression Database for the  
784 Meta-Analysis of Transcriptomes." *Advances in Bioinformatics* 2008: 5.
- 785 Hunter, T. (2007). "The age of crosstalk: phosphorylation, ubiquitination, and beyond."  
786 *Molecular cell* 28(5): 730-738.
- 787 Huot, B., J. Yao, B. L. Montgomery and S. Y. He (2014). "Growth-Defense Tradeoffs in Plants:  
788 A Balancing Act to Optimize Fitness." *Molecular Plant* 7(8): 1267-1287.
- 789 Iwata, Y., N. V. Fedoroff and N. Koizumi (2008). "Arabidopsis bZIP60 Is a Proteolysis-Activated  
790 Transcription Factor Involved in the Endoplasmic Reticulum Stress Response." *The Plant*  
791 *Cell* 20(11): 3107-3121.
- 792 Iwata, Y., T. Iida, T. Matsunami, Y. Yamada, K.-i. Mishiba, T. Ogawa, T. Kurata and N. Koizumi  
793 (2018). "Constitutive BiP protein accumulation in Arabidopsis mutants defective in a gene  
794 encoding chloroplast-resident stearyl-acyl carrier protein desaturase." *Genes to Cells*  
795 23(6): 456-465.
- 796 Kachroo, P., J. Shanklin, J. Shah, E. J. Whittle and D. F. Klessig (2001). "A fatty acid



797 desaturase modulates the activation of defense signaling pathways in plants." *Proceedings*  
798 *of the National Academy of Sciences* 98(16): 9448-9453.

799 Kim, J.-S., K. Yamaguchi-Shinozaki and K. Shinozaki (2018). "ER-Anchored Transcription  
800 Factors bZIP17 and bZIP28 Regulate Root Elongation." *Plant Physiology* 176(3): 2221.

801 Li, X., J. D. Clarke, Y. Zhang and X. Dong (2001). "Activation of an EDS1-Mediated R-Gene  
802 Pathway in the *snc1* Mutant Leads to Constitutive, NPR1-Independent Pathogen  
803 Resistance." *Molecular Plant-Microbe Interactions* 14(10): 1131-1139.

804 Linster, E., I. Stephan, W. V. Bienvenut, J. Maple-Grødem, L. M. Myklebust, M. Huber, M.  
805 Reichelt, C. Sticht, S. Geir Møller, T. Meinel, T. Arnesen, C. Giglione, R. Hell and M. Wirtz  
806 (2015). "Downregulation of N-terminal acetylation triggers ABA-mediated drought responses  
807 in *Arabidopsis*." *Nature Communications* 6(1): 7640.

808 Liszczak, G., T. Arnesen and R. Marmorstein (2011). "Structure of a Ternary Naa50p  
809 (NAT5/SAN) N-terminal Acetyltransferase Complex Reveals the Molecular Basis for  
810 Substrate-specific Acetylation." *Journal of Biological Chemistry* 286(42): 37002-37010.

811 Liu, J.-X. and S. H. Howell (2010). "Endoplasmic Reticulum Protein Quality Control and Its  
812 Relationship to Environmental Stress Responses in Plants." *The Plant Cell* 22(9): 2930-  
813 2942.

814 Maere, S., K. Heymans and M. Kuiper (2005). "BiNGO: a Cytoscape plugin to assess  
815 overrepresentation of Gene Ontology categories in Biological Networks." *Bioinformatics*  
816 21(16): 3448-3449.

817 Moreno, A. A., M. S. Mukhtar, F. Blanco, J. L. Boatwright, I. Moreno, M. R. Jordan, Y. Chen, F.  
818 Brandizzi, X. Dong, A. Orellana and K. M. Pajerowska-Mukhtar (2012). "IRE1/bZIP60-  
819 Mediated Unfolded Protein Response Plays Distinct Roles in Plant Immunity and Abiotic  
820 Stress Responses." *PLOS ONE* 7(2): e31944.

821 Nekrasov, V., J. Li, M. Batoux, M. Roux, Z.-H. Chu, S. Lacombe, A. Rougon, P. Bittel, M. Kiss-  
822 Papp, D. Chinchilla, H. P. van Esse, L. Jorda, B. Schwessinger, V. Nicaise, B. P. H. J.  
823 Thomma, A. Molina, J. D. G. Jones and C. Zipfel (2009). "Control of the pattern-recognition  
824 receptor EFR by an ER protein complex in plant immunity." *The EMBO journal* 28(21):  
825 3428-3438.

826 Nelson, B. K., X. Cai and A. Nebenführ (2007). "A multicolored set of in vivo organelle markers  
827 for co-localization studies in *Arabidopsis* and other plants." *The Plant Journal* 51(6): 1126-  
828 1136.

829 Pesaresi, P., N. A. Gardner, S. Masiero, A. Dietzmann, L. Eichacker, R. Wickner, F. Salamini  
830 and D. Leister (2003). "Cytoplasmic N-Terminal Protein Acetylation Is Required for Efficient

- 831        Photosynthesis in Arabidopsis." *The Plant Cell* 15(8): 1817.
- 832 Plevoda, B., T. Arnesen and F. Sherman (2009). "A synopsis of eukaryotic N $\alpha$ -terminal  
833        acetyltransferases: nomenclature, subunits and substrates." *BMC Proceedings* 3(6): S2.
- 834 Plevoda, B. and F. Sherman (2003). "Composition and function of the eukaryotic N-terminal  
835        acetyltransferase subunits." *Biochemical and Biophysical Research Communications*  
836        308(1): 1-11.
- 837 Qi, D., B. J. DeYoung and R. W. Innes (2012). "Structure-Function Analysis of the Coiled-Coil  
838        and Leucine-Rich Repeat Domains of the RPS5 Disease Resistance Protein." *Plant*  
839        *Physiology* 158(4): 1819-1832.
- 840 Qi, D. and K.-B. G. Scholthof (2008). "A one-step PCR-based method for rapid and efficient site-  
841        directed fragment deletion, insertion, and substitution mutagenesis." *Journal of Virological*  
842        *Methods* 149(1): 85-90.
- 843 Qi, Y. and F. Katagiri (2009). "Purification of low-abundance Arabidopsis plasma-membrane  
844        protein complexes and identification of candidate components." *The Plant Journal* 57(5):  
845        932-944.
- 846 Qiang, X., B. Zechmann, M. U. Reitz, K.-H. Kogel and P. Schäfer (2012). "The Mutualistic  
847        Fungus *Piriformospora indica* Colonizes Arabidopsis Roots by Inducing an Endoplasmic  
848        Reticulum Stress-Triggered Caspase-Dependent Cell Death." *The Plant Cell* 24(2): 794-  
849        809.
- 850 Raychaudhuri, S., M. Sinha, D. Mukhopadhyay and N. P. Bhattacharyya (2007). "HYPK, a  
851        Huntingtin interacting protein, reduces aggregates and apoptosis induced by N-terminal  
852        Huntingtin with 40 glutamines in Neuro2a cells and exhibits chaperone-like activity." *Human*  
853        *Molecular Genetics* 17(2): 240-255.
- 854 Reddi, R., V. Saddanapu, D. K. Chinthapalli, P. Sankuju, P. Sripadi and A. Addlagatta (2016).  
855        "Human Naa50 Protein Displays Broad Substrate Specificity for Amino-terminal Acetylation:  
856        DETAILED STRUCTURAL AND BIOCHEMICAL ANALYSIS USING TETRAPEPTIDE  
857        LIBRARY." *Journal of Biological Chemistry* 291(39): 20530-20538.
- 858 Reis, P. A. A., G. L. Rosado, L. A. C. Silva, L. C. Oliveira, L. B. Oliveira, M. D. L. Costa, F. C.  
859        Alvim and E. P. B. Fontes (2011). "The Binding Protein BiP Attenuates Stress-Induced Cell  
860        Death in Soybean via Modulation of the N-Rich Protein-Mediated Signaling Pathway." *Plant*  
861        *Physiology* 157(4): 1853-1865.
- 862 Richter, K., M. Haslbeck and J. Buchner (2010). "The Heat Shock Response: Life on the Verge  
863        of Death." *Molecular Cell* 40(2): 253-266.
- 864 Schmittgen, T. D. and K. J. Livak (2008). "Analyzing real-time PCR data by the comparative CT

- 865 method." *Nature Protocols* 3(6): 1101-1108.
- 866 Schwab, R., S. Ossowski, M. Riester, N. Warthmann and D. Weigel (2006). "Highly Specific  
867 Gene Silencing by Artificial MicroRNAs in Arabidopsis." *The Plant Cell* 18(5): 1121-1133.
- 868 Serrano, I., Y. Gu, D. Qi, U. Dubiella and R. W. Innes (2014). "The Arabidopsis EDR1 Protein  
869 Kinase Negatively Regulates the ATL1 E3 Ubiquitin Ligase to Suppress Cell Death." *The*  
870 *Plant Cell* 26(11): 4532.
- 871 Shao, F., C. Golstein, J. Ade, M. Stoutemyer, J. E. Dixon and R. W. Innes (2003). "Cleavage of  
872 Arabidopsis PBS1 by a Bacterial Type III Effector." *Science* 301(5637): 1230-1233.
- 873 Srivastava, R., Z. Li, G. Russo, J. Tang, R. Bi, U. Muppirala, S. Chudalayandi, A. Severin, M.  
874 He, S. I. Vaitkevicius, C. J. Lawrence-Dill, P. Liu, A. E. Stapleton, D. C. Bassham, F.  
875 Brandizzi and S. H. Howell (2018). "Response to Persistent ER Stress in Plants: A  
876 Multiphasic Process That Transitions Cells from Prosurvival Activities to Cell Death." *The*  
877 *Plant Cell* 30(6): 1220.
- 878 Tang, D., K. M. Christiansen and R. W. Innes (2005). "Regulation of Plant Disease Resistance,  
879 Stress Responses, Cell Death, and Ethylene Signaling in Arabidopsis by the EDR1 Protein  
880 Kinase." *Plant Physiology* 138(1018-1026).
- 881 Tintor, N. and Y. Saijo (2014). "ER-mediated control for abundance, quality, and signaling of  
882 transmembrane immune receptors in plants." *Frontiers in Plant Science* 5(65).
- 883 Valente, M. A. S., J. A. Q. A. Faria, J. R. L. Soares-Ramos, P. A. B. Reis, G. L. Pinheiro, N. D.  
884 Piovesan, A. T. Morais, C. C. Menezes, M. A. O. Cano, L. G. Fietto, M. E. Loureiro, F. J. L.  
885 Aragão and E. P. B. Fontes (2008). "The ER luminal binding protein (BiP) mediates an  
886 increase in drought tolerance in soybean and delays drought-induced leaf senescence in  
887 soybean and tobacco." *Journal of Experimental Botany* 60(2): 533-546.
- 888 van Anken, E., E. P. Romijn, C. Maggioni, A. Mezghrani, R. Sitia, I. Braakman and A. J. R. Heck  
889 (2003). "Sequential Waves of Functionally Related Proteins Are Expressed When B Cells  
890 Prepare for Antibody Secretion." *Immunity* 18(2): 243-253.
- 891 Van Damme, P., R. Evjenth, H. Foy, K. Demeyer, P.-J. De Bock, J. R. Lillehaug, J.  
892 Vandekerckhove, T. Arnesen and K. Gevaert (2011). "Proteome-derived Peptide Libraries  
893 Allow Detailed Analysis of the Substrate Specificities of N $\alpha$ -acetyltransferases and Point to  
894 hNaa10p as the Post-translational Actin N $\alpha$ -acetyltransferase." *Molecular & Cellular*  
895 *Proteomics* 10(5): M110.004580.
- 896 Vinatzer, B. A., G. M. Teitzel, M.-W. Lee, J. Jelenska, S. Hotton, K. Fairfax, J. Jenrette and J. T.  
897 Greenberg (2006). "The type III effector repertoire of *Pseudomonas syringae* pv. *syringae*  
898 B728a and its role in survival and disease on host and non-host plants." *Molecular*

- 899 Microbiology 62(1): 26-44.
- 900 Vitale, A. and R. S. Boston (2008). "Endoplasmic Reticulum Quality Control and the Unfolded  
901 Protein Response: Insights from Plants." *Traffic* 9(10): 1581-1588.
- 902 Walter, P. and D. Ron (2011). "The Unfolded Protein Response: From Stress Pathway to  
903 Homeostatic Regulation." *Science* 334(6059): 1081.
- 904 Waterhouse, A. M., J. B. Procter, D. M. A. Martin, M. Clamp and G. J. Barton (2009). "Jalview  
905 Version 2—a multiple sequence alignment editor and analysis workbench." *Bioinformatics*  
906 25(9): 1189-1191.
- 907 Wawrzynska, A., K. M. Christiansen, Y. Lan, N. L. Rodibaugh and R. W. Innes (2008). "Powdery  
908 mildew resistance conferred by loss of the ENHANCED DISEASE RESISTANCE1 protein  
909 kinase is suppressed by a missense mutation in KEEP ON GOING, a regulator of abscisic  
910 acid signaling." *Plant Physiology* 148: 1510-1522.
- 911 Williams, B., J. Verchot and M. B. Dickman (2014). "When supply does not meet demand-ER  
912 stress and plant programmed cell death." *Frontiers in plant science* 5: 211-211.
- 913 Woehlbier, U. and C. Hetz (2011). "Modulating stress responses by the UPRosome: A matter of  
914 life and death." *Trends in Biochemical Sciences* 36(6): 329-337.
- 915 Xu, F., Y. Huang, L. Li, P. Gannon, E. Linster, M. Huber, P. Kapos, W. Bienvenut, B. Polevoda,  
916 T. Meinnel, R. Hell, C. Giglione, Y. Zhang, M. Wirtz, S. Chen and X. Li (2015). "Two N-  
917 Terminal Acetyltransferases Antagonistically Regulate the Stability of a Nod-Like Receptor  
918 in Arabidopsis." *The Plant Cell* 27(5): 1547.
- 919 Zhang, L., Z. Xin, X. Yu, C. Ma, W. Liang, M. Zhu, Q. Cheng, Z. Li, Y. Niu, Y. Ren, Z. Wang and  
920 T. Lin (2017). "Osmotic Stress Induced Cell Death in Wheat Is Alleviated by  
921 Tauroursodeoxycholic Acid and Involves Endoplasmic Reticulum Stress-Related Gene  
922 Expression." *Frontiers in Plant Science* 8(667).
- 923
- 924

925 **FIGURE LEGENDS**

926 **Fig. 1.** NAA50 physically interacts with EDR1. **A**, Naa50 is conserved in *Arabidopsis*. Amino acid  
927 alignment depicting *Arabidopsis* NAA50 and human Naa50. This alignment was generated using  
928 Clustal Omega (<https://www.ebi.ac.uk/Tools/msa/clustalo/>) and visualized in Jalview  
929 (Waterhouse et al., 2009). **B**, EDR1 interacts with NAA50 in yeast two-hybrid. AD, GAL4  
930 activation domain fusion; BD, GAL4 DNA binding domain fusion. **C**, Immunoblot analysis of yeast  
931 strains from panel B. EDR1-BD accumulated poorly in yeast, and a significant accumulation of  
932 degraded EDR1-BD (\*) was visible. **D**, NAA50 co-immunoprecipitates with EDR1. The indicated  
933 constructs were transiently expressed in *N. benthamiana* and then immunoprecipitated using  
934 GFP-Trap beads. **E**, NAA50 co-localizes with the ER marker SDF2. mCherry-tagged NAA50 and  
935 GFP-tagged SDF2 were transiently co-expressed in *N. benthamiana*. Bars = 50 microns. These  
936 experiments were repeated three times with similar results.

937  
938 **Fig. 2.** NAA50 is required for plant development. **A**, Loss of NAA50 results in dwarfed seedlings.  
939 Representative seven-day-old, MS-grown seedlings are depicted. **B**, NAA50-sYFP complements  
940 *naa50*-mediated dwarfism. Four-week-old adult plants are shown. NP, Native NAA50 Promoter.  
941 **C**, *naa50* plants can develop stems and flowers. A five-week-old *naa50-2* plant is shown.

942  
943 **Fig. 3.** Loss of NAA50 results in developmental changes. **A**, *naa50* seedlings have altered root  
944 morphology. The seedling roots depicted are from one-week-old seedlings. **B**, Vacuole and cell  
945 morphology are altered in *naa50* seedling roots. Shown are fluorescence micrographs taken of  
946 seven-day-old wildtype and *naa50-1* seedlings expressing mCherry-tagged  $\gamma$ TIP. Scale bars =  
947 50 microns. **C**, Dexamethasone treatment induces knockdown of NAA50 in DEX:NAA50-ami  
948 plants. q-RT PCR was performed on cDNA generated from multiple adult DEX:NAA50-ami plants  
949 following dexamethasone treatment. Displayed are the averages of three replicates. Asterisk  
950 denotes *P* value < 0.05. Expression values were normalized to *ACTIN2*. This experiment was  
951 repeated three independent times with similar results. **D**, NAA50 knockdown induces changes to  
952 root cell morphology. Five-day-old seedlings were transferred from MS plates to MS plates  
953 supplemented with DEX. Images were taken three days after dexamethasone exposure. **E**,  
954 NAA50 knockdown slows root elongation. Seven-day-old seedlings were transferred to MS plates  
955 supplemented with ethanol or dexamethasone. Images were taken three days after transfer to  
956 ethanol- or dexamethasone-supplemented media. **F**, NAA50 knockdown induces stem bending.  
957 Images were taken 24 hours after dexamethasone treatment. Numbers indicate proportion of all  
958 stems which displayed the given morphology. **G**, NAA50 knockdown stalls stem growth. Stem

959 measurements were taken on DEX:Scrambled-ami (n = 8) and DEX:NAA50-ami (n = 10)  
960 immediately before and six days after dexamethasone treatment. No stem growth was detected  
961 in DEX:NAA50-ami plants. **H**, Removal of the apical meristem inhibits *NAA50* knockdown-  
962 mediated stem bending. Adult DEX:NAA50-ami plants were sprayed with dexamethasone and  
963 images were taken twenty-four hours later. The shoot apical meristem was removed immediately  
964 prior to dexamethasone treatment.

965

966 **Fig. 4.** Loss of *NAA50* induces cell death and senescence. **A**, *NAA50* knockdown induces  
967 senescence in adult leaves. Four-week-old plants were sprayed with dexamethasone. Images  
968 were taken immediately before, and seven days after treatment. **B**, *NAA50* knockdown induces  
969 senescence in seedlings. Seedlings were grown on MS plates for seven days, and then  
970 transferred to MS plates supplemented with ethanol or dexamethasone. Images were taken seven  
971 days after transfer to ethanol- or dexamethasone-supplemented media. **C**, *naa50* seedling roots  
972 contain dead cells. Seven-day-old seedlings were stained with trypan blue dye. **D**, Cell death  
973 staining in *naa50* roots is spotty and irregular. Images depict trypan blue-stained roots from  
974 seven-day-old seedlings. **E**, Loss of *EDR1* does not alter senescence in *NAA50* knockdown  
975 plants. Images were taken of four-week-old plants immediately before, and seven days after  
976 dexamethasone treatment.

977

978 **Fig. 5.** *NAA50* knockdown induces changes to growth and defense signaling. **A**, *NAA50*  
979 knockdown results in a downregulation of growth signaling, and an upregulation of defense  
980 signaling. Gene Ontology (GO) term enrichment analysis was performed using the BiNGO  
981 application to determine whether the DEX:NAA50-ami transcriptome was enriched for specific  
982 biological processes. NS, not statistically significant. **B**, The DEX:NAA50-ami transcriptome bears  
983 similarity to biotic and abiotic stress studies. The 330 most significantly altered transcripts (based  
984 on  $\log_2$  fold-change) from the DEX:NAA50-ami 12 hour dataset were compared to previous  
985 studies using the Geneinvestigator Signature tool. The five most related transcriptomes based on  
986 the calculated Relative Similarity scores are shown. A heatmap was generated using Heatmapper  
987 (<http://www2.heatmapper.ca/expression/>) to display the relative  $\log_2$  fold-change for each of the  
988 330 transcripts for each study.

989

990 **Fig. 6.** Loss of *EDR1* and *NAA50* result in changes to ER stress signaling. **A**, *edr1-1* mutants  
991 display heightened ER stress sensitivity. Leaves from six-week-old plants were infiltrated with  
992 various concentrations of tunicamycin using a needleless syringe. Leaves were removed, and

993 images taken three days after injection. **B**, ER stress induces *naa50*-like root dwarfism. Seedlings  
994 were germinated on MS plates or MS supplemented with TM or DTT. Representative ten-day-old  
995 seedlings are shown. **C**, ER stress induces *naa50*-like root cell morphology. Roots of ten-day-old  
996 seedlings are depicted. Seedlings were grown on regular MS plates or MS plates supplemented  
997 with TM or DTT. **D**, ER stress induces cell death in roots. Ten-day-old seedlings were stained  
998 with trypan blue after growth on MS or MS supplemented with TM or DTT. **E**, *naa50-1* seedlings  
999 display heightened ER stress signaling in the absence of TM treatment. qRT-PCR was performed  
1000 on cDNA generated from wildtype and *naa50-1* seedlings. Seedlings were germinated on MS  
1001 plates and 5 days later transferred to regular MS or MS supplemented with 1  $\mu$ g/mL TM. RNA  
1002 was collected twenty hours after transfer to new plates. Gene expression values were normalized  
1003 to *ACTIN2*. Values depict the averages of three biological replicates, each consisting of twenty  
1004 individual seedlings. Error bars represent standard deviation between three independent  
1005 biological replicates. Asterisk denotes *P* value < 0.05. **F**, *bZIP60* splicing is induced in *naa50-1*  
1006 seedlings. RT-PCR was performed on the same cDNA used in panel E. Each lane represents a  
1007 unique biological replicate derived from twenty seedlings.

1008

1009 **Fig. 7.** NAA50 enzymatic activity is required for plant development. **A**, Recombinant NAA50  
1010 displays auto-acetylation activity *in vitro*. Recombinant HIS-tagged NAA50 was expressed and  
1011 purified from *E. coli*. *In vitro* reactions were performed at 30°C for the indicated time points.  
1012 Samples were then boiled and subjected to gel electrophoresis and immunoblotting using an anti-  
1013 acetyl-lysine antibody. This experiment was repeated three times with similar results. **B**, NAA50  
1014 co-localizes with NAA10. sYFP-tagged NAA50 was transiently co-expressed with mCherry-  
1015 tagged NAA10 in *N. benthamiana*. Bars = 50 microns. **C**, Immunoblotting demonstrates that HA-  
1016 tagged NAA50 mutant transgenes are expressed in transgenic plants. Leaf tissue from  
1017 hygromycin-resistant T3 plants was subjected to gel electrophoresis and immunoblotting using  
1018 an anti-HA antibody. **D**, Mutant *NAA50* transgenes do not complement *naa50* root dwarfism.  
1019 Representative ten-day-old seedlings are depicted. **E**, Mutant *NAA50* transgenes do not  
1020 complement *naa50* root cell morphology defects. Images were taken of representative ten-day-  
1021 old seedlings. **F**, NAA50I145A can complement *naa50*-mediated rosette dwarfism. The top row  
1022 depicts representative seven-week-old plants. The bottom row depicts representative 5-week-old  
1023 plants. **G**, NAA50I145A does not complement *naa50*-mediated sterility. Stems were removed  
1024 from 7-week-old plants.

1025

1026 **Fig. 8.** Model for EDR1- and NAA50-mediated regulation of ER stress. Left: In wildtype plants,  
1027 EDR1 activates NAA50-mediated NTA, possibly through phosphorylation. NAA50-mediated NTA  
1028 ensures proper protein folding, thereby inhibiting ER stress. Middle: In plants lacking functional  
1029 NAA50, the absence of NAA50-mediated NTA results in protein aggregation and ER stress. Right:  
1030 Biotic and abiotic stress events strain the translational machinery requiring altered or enhanced  
1031 NAA50-mediated NTA. In plants lacking EDR1, NAA50 is not properly activated during these  
1032 events, resulting in enhanced ER stress and senescence.



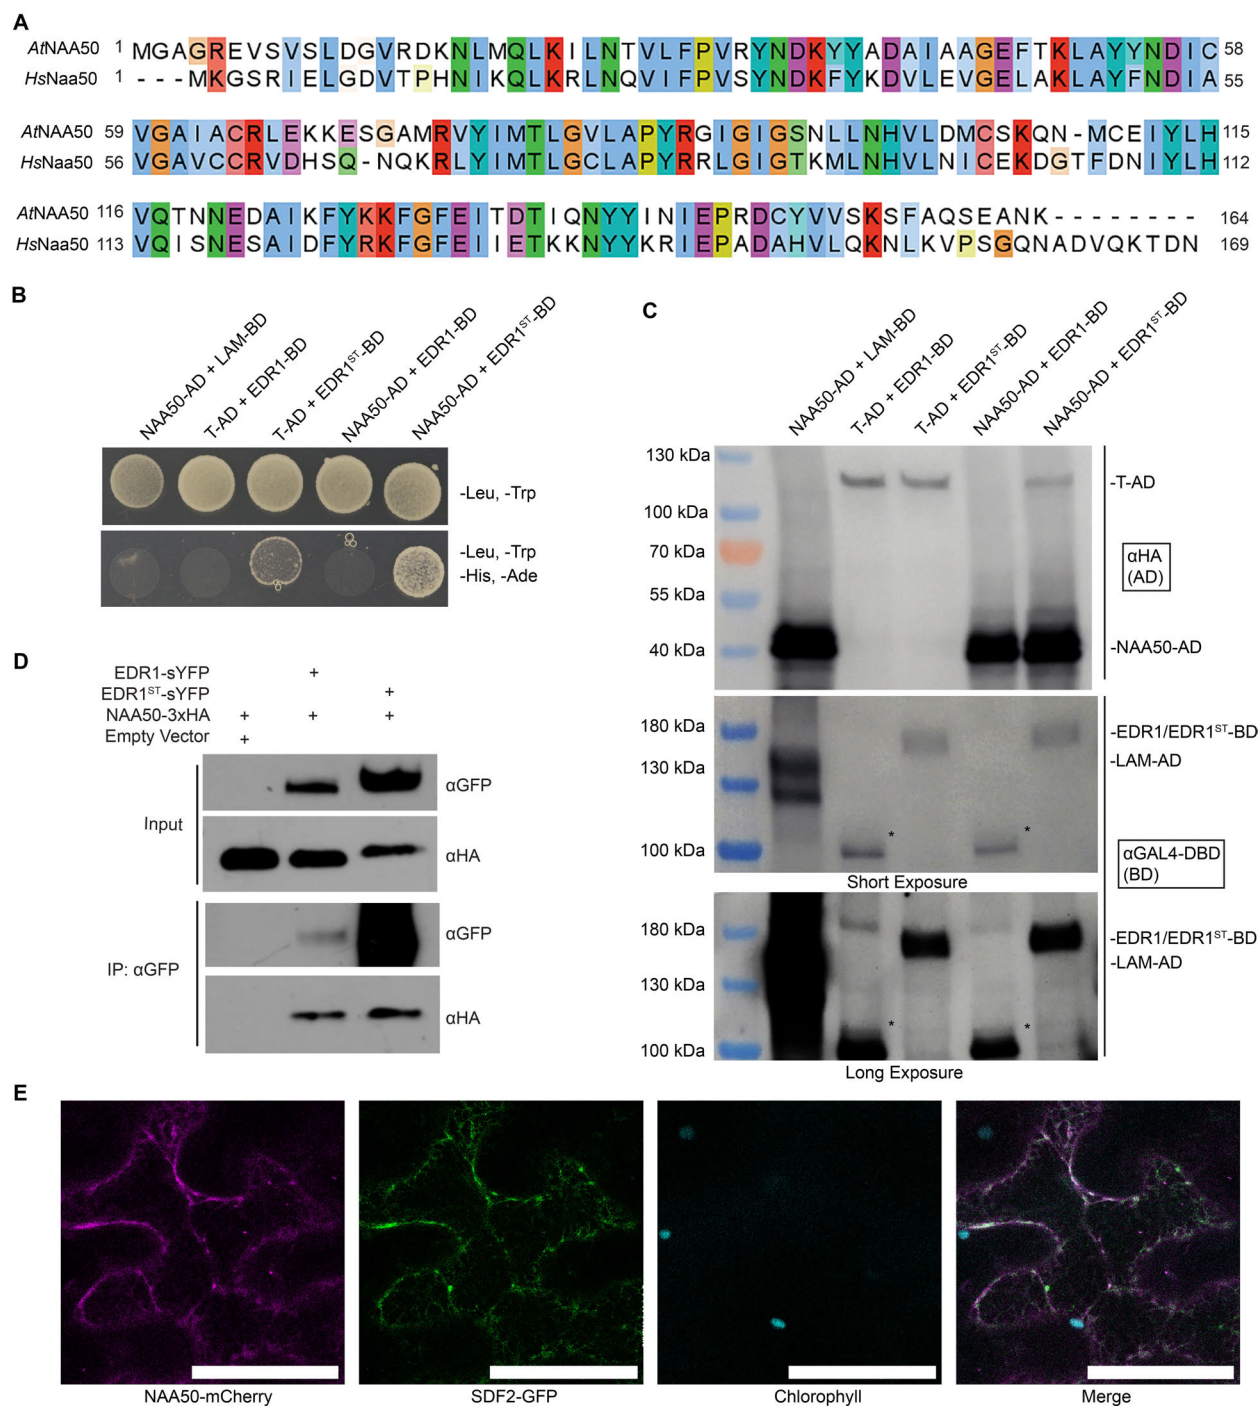

**Fig. 1.** NAA50 physically interacts with EDR1. **A**, Naa50 is conserved in *Arabidopsis*. Amino acid alignment depicting *Arabidopsis* NAA50 and human Naa50. This alignment was generated using Clustal Omega (<https://www.ebi.ac.uk/Tools/msa/clustalo/>) and visualized in Jalview (Waterhouse et al., 2009). **B**, EDR1 interacts with NAA50 in yeast two-hybrid. AD, GAL4 activation domain fusion; BD, GAL4 DNA binding domain fusion. **C**, Immunoblot analysis of yeast strains from panel B. EDR1-BD accumulated poorly in yeast, and a significant accumulation of degraded EDR1-BD (\*) was visible. **D**, NAA50 co-immunoprecipitates with EDR1. The indicated constructs were transiently expressed in *N. benthamiana* and then immunoprecipitated using GFP-Trap beads. **E**, NAA50 co-localizes with the ER marker SDF2. mCherry-tagged NAA50 and GFP-tagged SDF2 were transiently co-expressed in *N. benthamiana*. Bars = 50 microns. These experiments were repeated three times with similar results.

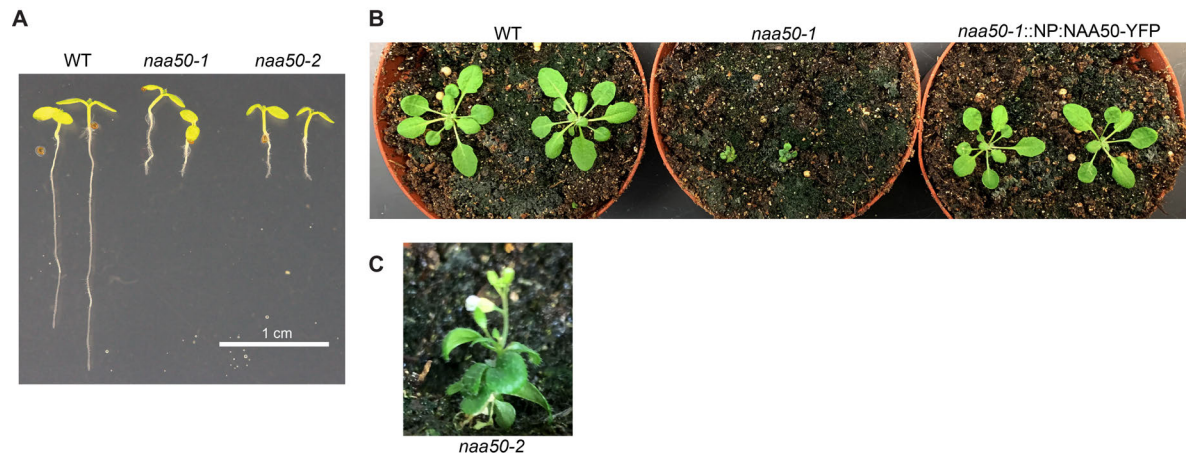

**Fig. 2.** *NAA50* is required for plant development. **A**, Loss of *NAA50* results in dwarfed seedlings. Representative seven-day-old, MS-grown seedlings are depicted. **B**, *NAA50*-sYFP complements *naa50*-mediated dwarfism. Four-week-old adult plants are shown. NP, Native *NAA50* Promoter. **C**, *naa50* plants can develop stems and flowers. A five-week-old *naa50-2* plant is shown.

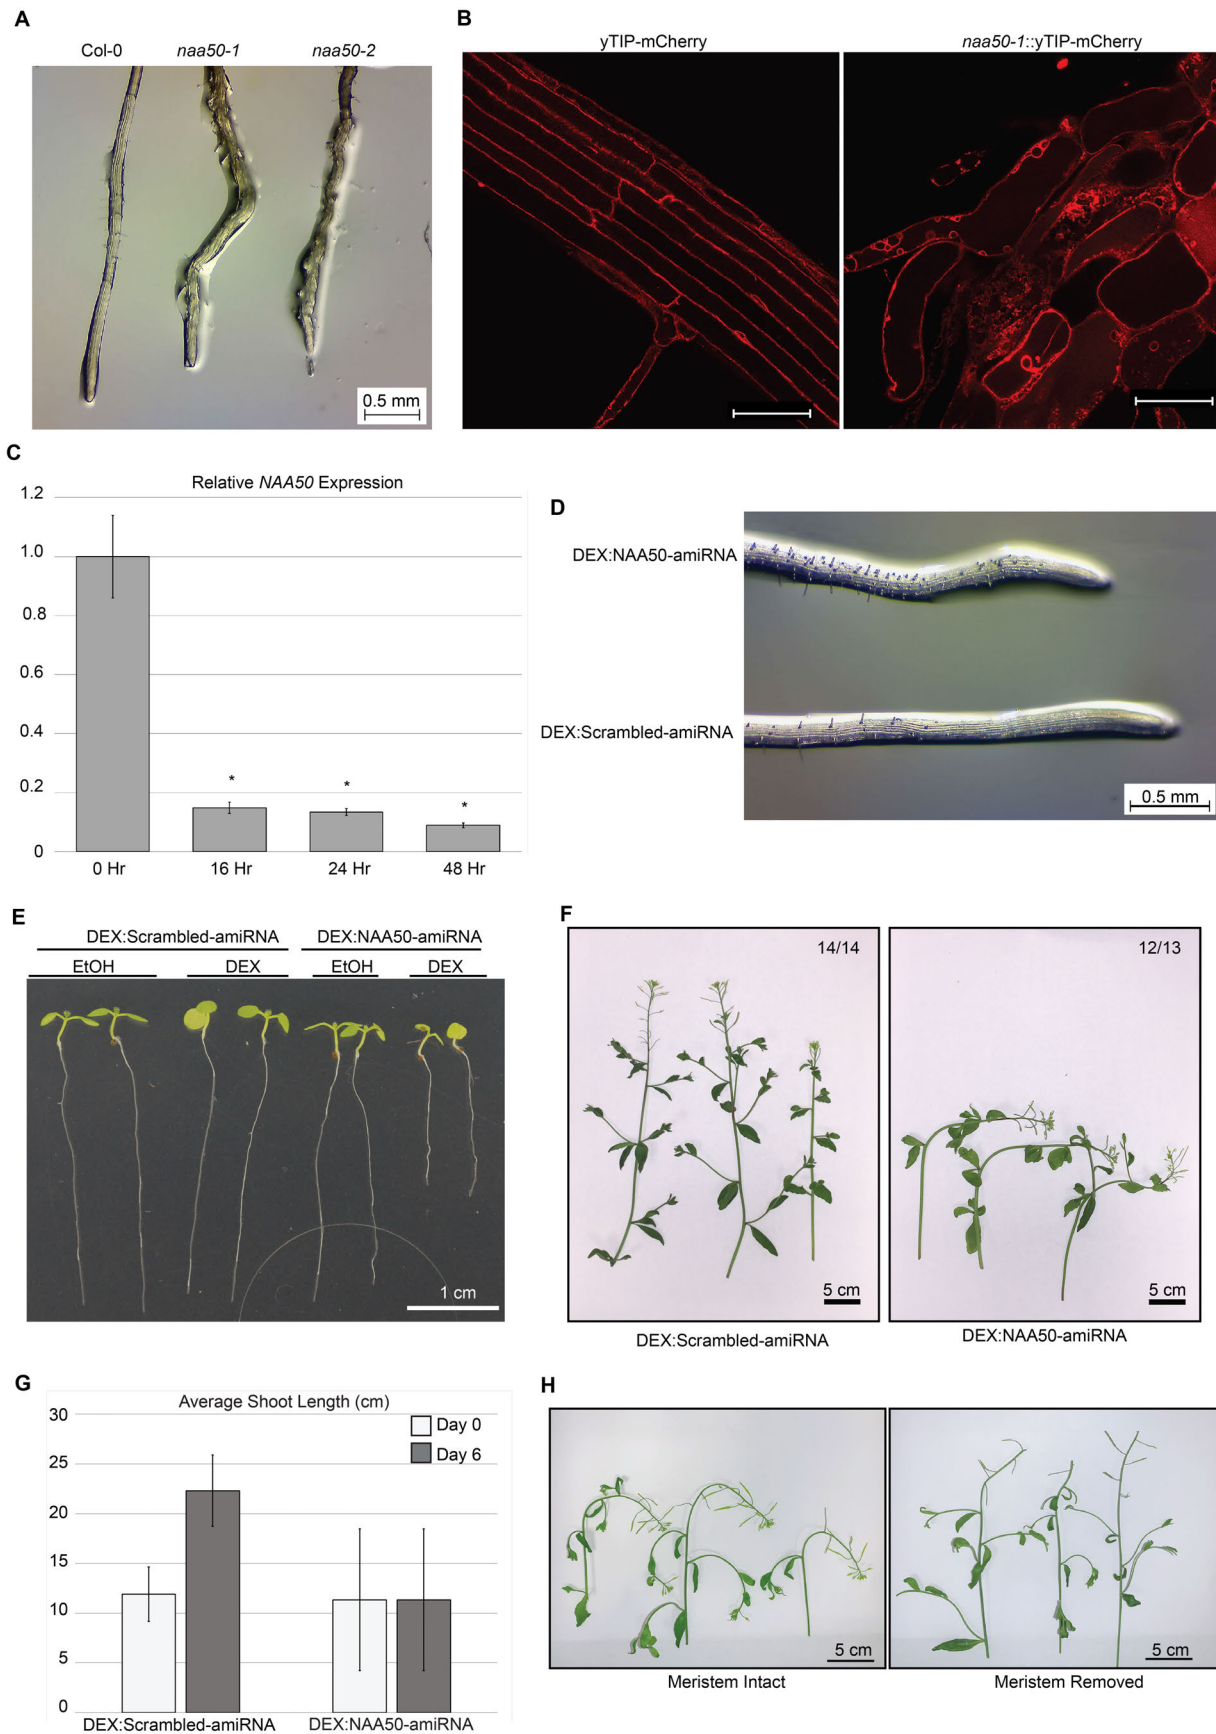

**Fig. 3.** Loss of *NAA50* results in developmental changes. **A**, *naa50* seedlings have altered root morphology. The seedling roots depicted are from one-week-old seedlings. **B**, Vacuole and cell morphology are altered in *naa50* seedling roots. Shown are fluorescence micrographs taken of seven-day-old wildtype and *naa50-1* seedlings expressing mCherry-tagged  $\gamma$ TIP. Scale bars = 50 microns. **C**, Dexamethasone treatment induces knockdown of *NAA50* in DEX:*NAA50*-ami plants. q-RT PCR was performed on cDNA generated from multiple adult DEX:*NAA50*-ami plants following dexamethasone treatment. Displayed are the averages of three replicates. Asterisk denotes *P* value < 0.05. Expression values were normalized to *ACTIN2*. This experiment was repeated three independent times with similar results. **D**, *NAA50* knockdown induces changes to root cell morphology. Five-day-old seedlings were transferred from MS plates to MS plates supplemented with DEX. Images were taken three days after dexamethasone exposure. **E**, *NAA50* knockdown slows root elongation. Seven-day-old seedlings were transferred to MS plates supplemented with ethanol or dexamethasone. Images were taken three days after transfer to ethanol- or dexamethasone-supplemented media. **F**, *NAA50* knockdown induces stem bending. Images were taken 24 hours after dexamethasone treatment. Numbers indicate proportion of all stems which displayed the given morphology. **G**, *NAA50* knockdown stalls stem growth. Stem measurements were taken on DEX:Scrambled-ami (*n* = 8) and DEX:*NAA50*-ami (*n* = 10) immediately before and six days after dexamethasone treatment. No stem growth was detected in DEX:*NAA50*-ami plants. **H**, Removal of the apical meristem inhibits *NAA50* knockdown-mediated stem bending. Adult DEX:*NAA50*-ami plants were sprayed with dexamethasone and images were taken twenty-four hours later. The shoot apical meristem was removed immediately prior to dexamethasone treatment.

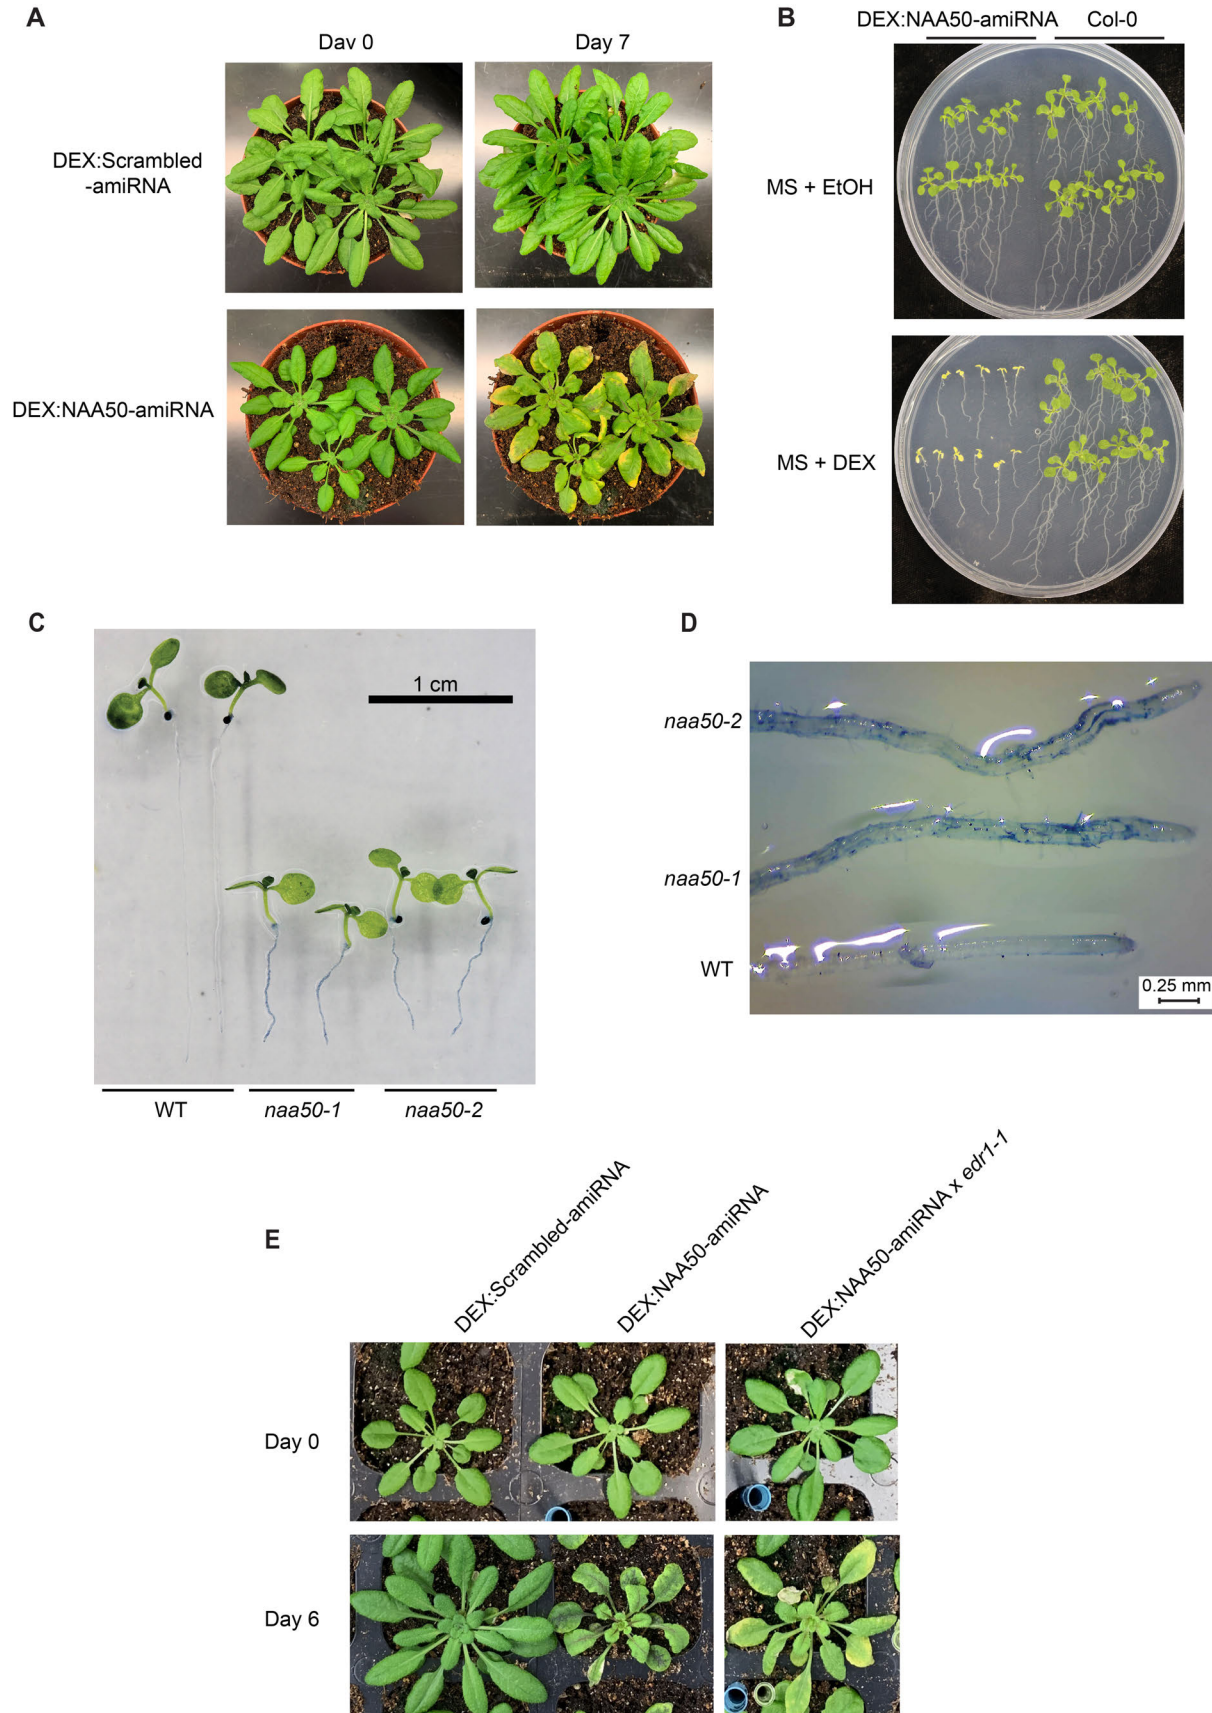

**Fig. 4.** Loss of *NAA50* induces cell death and senescence. **A**, *NAA50* knockdown induces senescence in adult leaves. Four-week-old plants were sprayed with dexamethasone. Images were taken immediately before, and seven days after treatment. **B**, *NAA50* knockdown induces senescence in seedlings. Seedlings were grown on MS plates for seven days, and then transferred to MS plates supplemented with ethanol or dexamethasone. Images were taken seven days after transfer to ethanol- or dexamethasone-supplemented media. **C**, *naa50* seedling roots contain dead cells. Seven-day-old seedlings were stained with trypan blue dye. **D**, Cell death staining in *naa50* roots is spotty and irregular. Images depict trypan blue-stained roots from seven-day-old seedlings. **E**, Loss of *EDR1* does not alter senescence in *NAA50* knockdown plants. Images were taken of four-week-old plants immediately before, and seven days after dexamethasone treatment.

**A**

| Downregulated                        |                    |                    |
|--------------------------------------|--------------------|--------------------|
| GO TERM                              | Adj. P Value 12 Hr | Adj. P Value 24 Hr |
| Photosynthesis                       | 1.21E-10           | 2.11E-21           |
| DNA Replication                      | 1.27E-07           | NS                 |
| Response to Blue Light               | 9.57E-07           | 1.32E-08           |
| Response to Red Light                | 1.92E-06           | 3.00E-08           |
| Response to Hormone Stimulus         | 3.45E-06           | 2.85E-06           |
| Peptide Transport                    | 1.48E-05           | 2.34E-03           |
| Response to Auxin Stimulus           | 2.96E-03           | 5.76E-05           |
| Response to Water Deprivation        | 3.63E-03           | NS                 |
| Response to Water                    | 5.51E-03           | NS                 |
| Response to Gibberellin Stimulus     | 5.98E-03           | 7.78E-03           |
| Plant-Type Cell Wall Modification    | 8.12E-03           | NS                 |
| Cell Growth                          | 8.77E-03           | NS                 |
| Phototropism                         | 1.64E-02           | 2.34E-03           |
| Pigment Biosynthetic Process         | 7.58E-02           | 1.73E-02           |
| Tropism                              | 8.14E-02           | 3.12E-03           |
| Response to Stress                   | 8.82E-02           | NS                 |
| Negative Gravitropism                | NS                 | 3.39E-02           |
| Response to Cytokinin Stimulus       | NS                 | 3.44E-02           |
| Upregulated                          |                    |                    |
| GO TERM                              | Adj. P Value 12 Hr | Adj. P Value 24 Hr |
| Response to Hormone Stimulus         | 3.70E-06           | 1.72E-05           |
| Response to Abscisic Acid Stimulus   | 1.04E-05           | 7.74E-09           |
| Response to Salicylic Acid Stimulus  | 7.29E-05           | NS                 |
| Response to Jasmonic Acid Stimulus   | 2.05E-04           | NS                 |
| Response to Osmotic Stress           | 2.36E-04           | 5.19E-09           |
| Response to Metal Ion                | 5.79E-04           | NS                 |
| Response to Light Stimulus           | 6.56E-04           | NS                 |
| Response to Salt Stress              | 8.68E-04           | 1.62E-06           |
| Response to Stress                   | 5.04E-03           | 3.03E-12           |
| Cell Wall Organization or Biogenesis | 2.00E-02           | 1.21E-03           |
| Response to Cold                     | NS                 | 2.55E-05           |
| Defense Response to Fungus           | NS                 | 6.32E-05           |
| Response to Temperature Stimulus     | NS                 | 2.37E-04           |
| Defense Response                     | NS                 | 5.23E-04           |
| Response to Wounding                 | NS                 | 9.01E-04           |

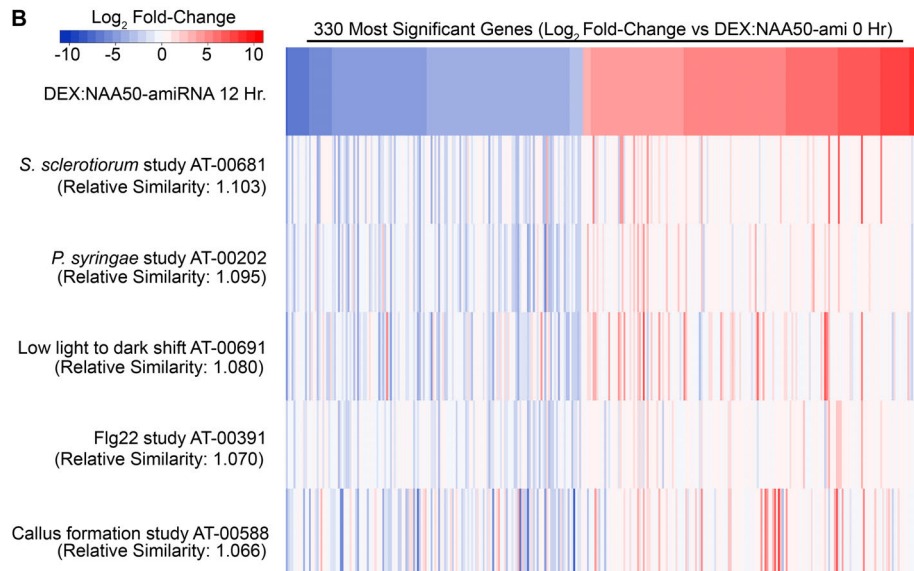

**Fig. 5.** *NAA50* knockdown induces changes to growth and defense signaling. **A**, *NAA50* knockdown results in a downregulation of growth signaling, and an upregulation of defense signaling. Gene Ontology (GO) term enrichment analysis was performed using the BiNGO application to determine whether the DEX:*NAA50*-ami transcriptome was enriched for specific biological processes. NS, not statistically significant. **B**, The DEX:*NAA50*-ami transcriptome bears similarity to biotic and abiotic stress studies. The 330 most significantly altered transcripts (based on Log<sub>2</sub> fold-change) from the DEX:*NAA50*-ami 12 hour dataset were compared to previous studies using the Genevestigator Signature tool. The five most related transcriptomes based on the calculated Relative Similarity scores are shown. A heatmap was generated using Heatmapper (<http://www2.heatmapper.ca/expression/>) to display the relative log<sub>2</sub> fold-change for each of the 330 transcripts for each study.

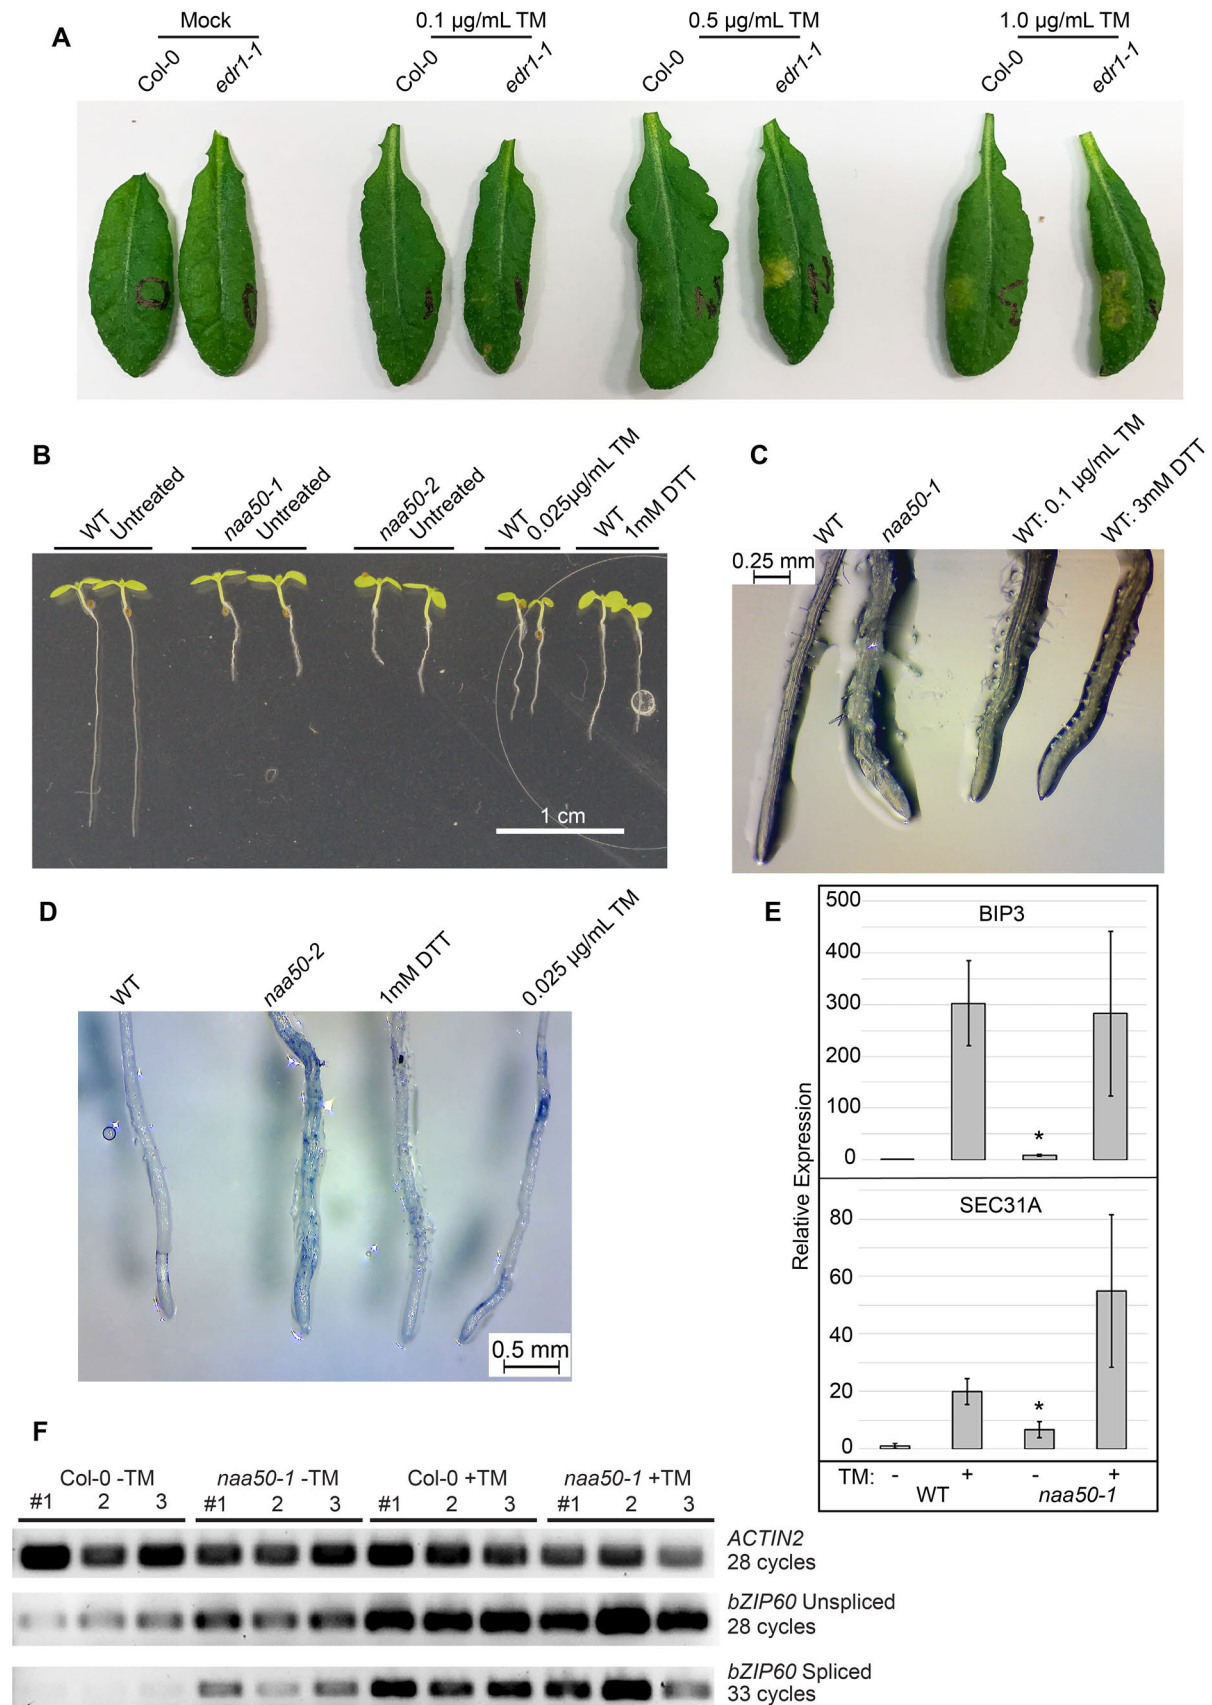



**Fig. 6.** Loss of *EDR1* and *NAA50* result in changes to ER stress signaling. **A**, *edr1-1* mutants display heightened ER stress sensitivity. Leaves from six-week-old plants were infiltrated with various concentrations of tunicamycin using a needleless syringe. Leaves were removed, and images taken three days after injection. **B**, ER stress induces *naa50*-like root dwarfism. Seedlings were germinated on MS plates or MS supplemented with TM or DTT. Representative ten-day-old seedlings are shown. **C**, ER stress induces *naa50*-like root cell morphology. Roots of ten-day-old seedlings are depicted. Seedlings were grown on regular MS plates or MS plates supplemented with TM or DTT. **D**, ER stress induces cell death in roots. Ten-day-old seedlings were stained with trypan blue after growth on MS or MS supplemented with TM or DTT. **E**, *naa50-1* seedlings display heightened ER stress signaling in the absence of TM treatment. qRT-PCR was performed on cDNA generated from wildtype and *naa50-1* seedlings. Seedlings were germinated on MS plates and 5 days later transferred to regular MS or MS supplemented with 1  $\mu$ g/mL TM. RNA was collected twenty hours after transfer to new plates. Gene expression values were normalized to *ACTIN2*. Values depict the averages of three biological replicates, each consisting of twenty individual seedlings. Error bars represent standard deviation between three independent biological replicates. Asterisk denotes *P* value < 0.05. **F**, *bZIP60* splicing is induced in *naa50-1* seedlings. RT-PCR was performed on the same cDNA used in panel E. Each lane represents a unique biological replicate derived from twenty seedlings.

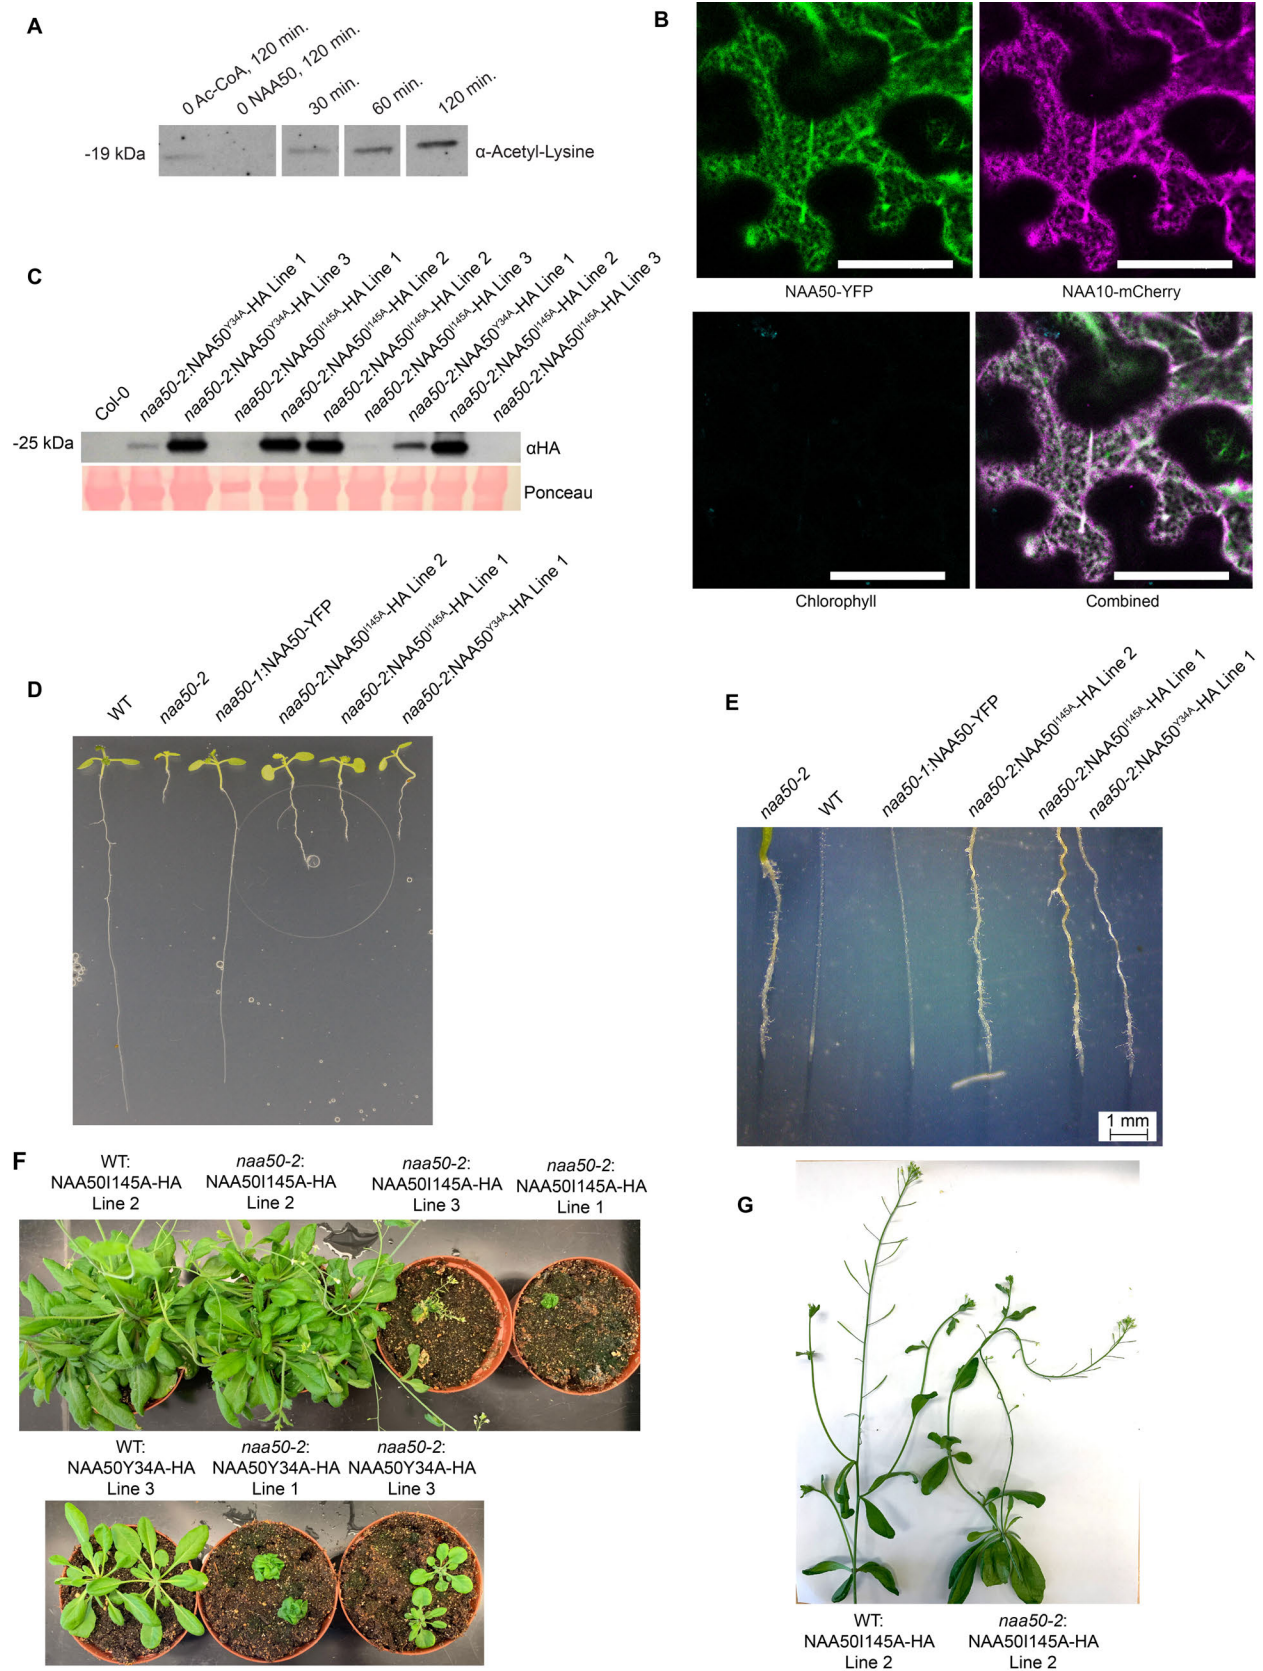

**Fig. 7.** NAA50 enzymatic activity is required for plant development. **A**, Recombinant NAA50 displays auto-acetylation activity *in vitro*. Recombinant HIS-tagged NAA50 was expressed and purified from *E. coli*. *In vitro* reactions were performed at 30°C for the indicated time points. Samples were then boiled and subjected to gel electrophoresis and immunoblotting using an anti-acetyl-lysine antibody. This experiment was repeated three times with similar results. **B**, NAA50 co-localizes with NAA10. sYFP-tagged NAA50 was transiently co-expressed with mCherry-tagged NAA10 in *N. benthamiana*. Bars = 50 microns. **C**, Immunoblotting demonstrates that HA-tagged NAA50 mutant transgenes are expressed in transgenic plants. Leaf tissue from hygromycin-resistant T3 plants was subjected to gel electrophoresis and immunoblotting using an anti-HA antibody. **D**, Mutant *NAA50* transgenes do not complement *naa50* root dwarfism. Representative ten-day-old seedlings are depicted. **E**, Mutant *NAA50* transgenes do not complement *naa50* root cell morphology defects. Images were taken of representative ten-day-old seedlings. **F**, NAA50I145A can complement *naa50*-mediated rosette dwarfism. The top row depicts representative seven-week-old plants. The bottom row depicts representative 5-week-old plants. **G**, NAA50I145A does not complement *naa50*-mediated sterility. Stems were removed from 7-week-old plants.

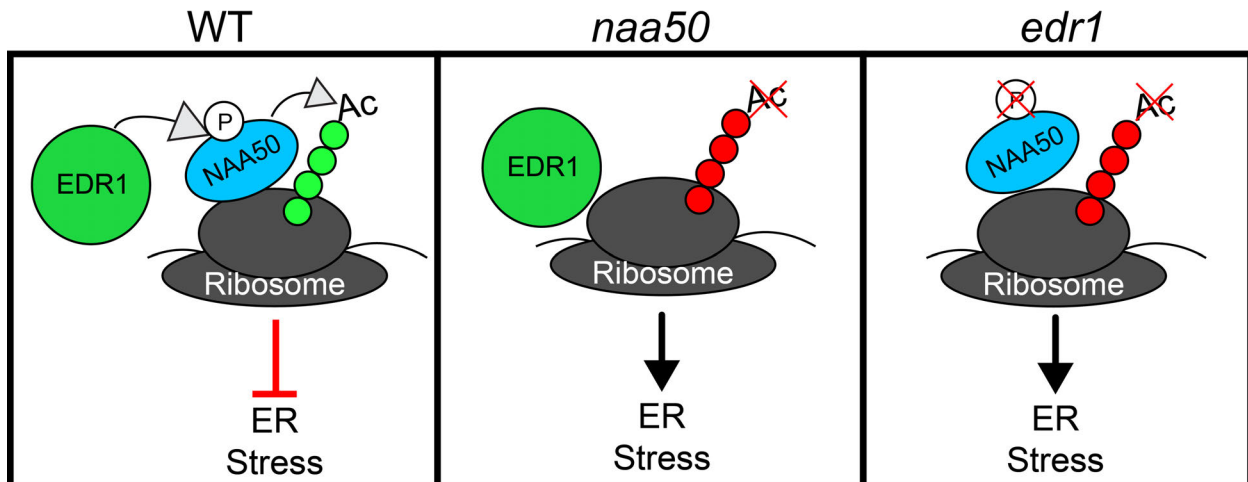

**Fig. 8.** Model for EDR1- and NAA50-mediated regulation of ER stress. Left: In wildtype plants, EDR1 activates NAA50-mediated NTA, possibly through phosphorylation. NAA50-mediated NTA ensures proper protein folding, thereby inhibiting ER stress. Middle: In plants lacking functional NAA50, the absence of NAA50-mediated NTA results in protein aggregation and ER stress. Right: Biotic and abiotic stress events strain the translational machinery requiring altered or enhanced NAA50-mediated NTA. In plants lacking EDR1, NAA50 is not properly activated during these events, resulting in enhanced ER stress and senescence.
